# Supplementary material for: Unveiling the correlation between the catalytic efficiency and acidity of a metal-free catalyst in a hydrogenation reaction. A theoretical case study of the hydrogenation of ethene catalyzed by a superacid arising from a superhalogen
Source: Royal Society of Chemistry journal article supplement (doi:10.1039/d3cp03147k), 2023-01-01
Supplement: d3cp03147k1.pdf [file d3cp03147k1.pdf]

## Supporting Information

In the text, the gas acidity  $\Delta G_{\text{acid}}$  of superacid is defined as:

The deprotonation process of the composites could be described as shown in eqn (1):

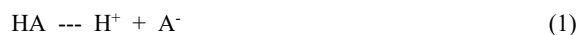

Correspondingly, the Gibbs free energy change of this process in gas phase, i.e.,  $\Delta G_{\text{acid}}$ , is defined by eqn (2):

$$\Delta G_{\text{acid}} = \Delta G_{\text{H}^+} + \Delta G_{\text{A}^-} - \Delta G_{\text{HA}} \quad (2)$$

In principle, the lower the  $\Delta G_{\text{acid}}$  value, the stronger would be the acidity. Generally, a compound could be theoretically characterized as a superacid in gas phase if its  $\Delta G_{\text{acid}}$  is less than 300 kcal mol<sup>-1</sup>.

**Table S1.** The gas  $\Delta G_{\text{acid}}$  value of superacid HA (A= MgX<sub>3</sub>, Mg<sub>2</sub>X<sub>5</sub>) and strong acid HX(X=F, Cl, Br) at the level of B3LYP-D3(BJ)/6-311++G(d,p).

|                          | HF                                | HCl                                | HBr                                | HMgF <sub>3</sub>                 | HMgCl <sub>3</sub>                 | HMgBr <sub>3</sub>                 |
|--------------------------|-----------------------------------|------------------------------------|------------------------------------|-----------------------------------|------------------------------------|------------------------------------|
| $\Delta G_{\text{acid}}$ | 362.61                            | 326.53                             | 318.33                             | 288.18                            | 266.73                             | 263.42                             |
|                          | D-HMg <sub>2</sub> F <sub>5</sub> | D-HMg <sub>2</sub> Cl <sub>5</sub> | D-HMg <sub>2</sub> Br <sub>5</sub> | T-HMg <sub>2</sub> F <sub>5</sub> | T-HMg <sub>2</sub> Cl <sub>5</sub> | T-HMg <sub>2</sub> Br <sub>5</sub> |
|                          | 285.77                            | 261.63                             | 258.93                             | 266.61                            | 246.66                             | 245.12                             |

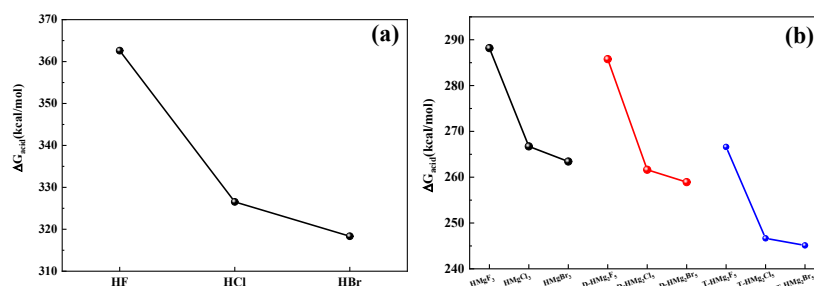

**Figure S1.** The trend of gas  $\Delta G_{\text{acid}}$  value of superacid HA (A= MgX<sub>3</sub>, Mg<sub>2</sub>X<sub>5</sub>) and strong acid HX(X=F, Cl, Br) with the order of F, Cl, Br.

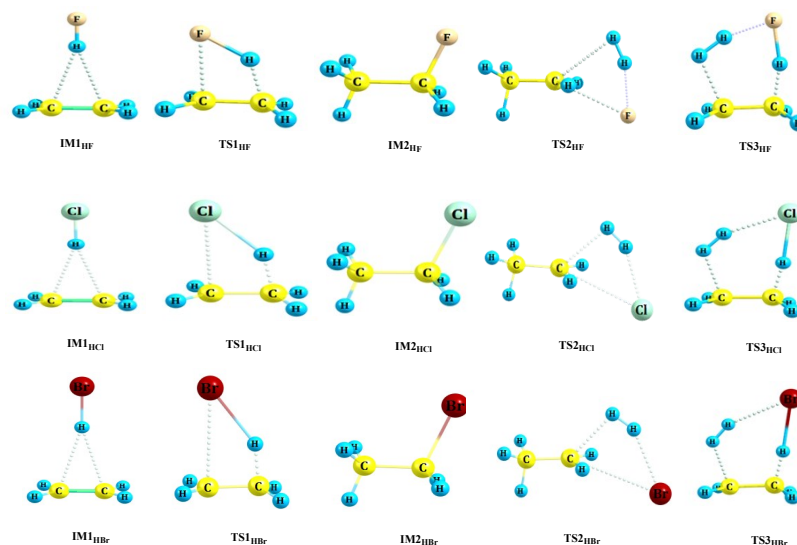

**Figure S2.** The 3D geometries of important intermediates and transition states in process of strong acid HX(X=F, Cl, Br) catalyzed hydrogenation of ethylene.

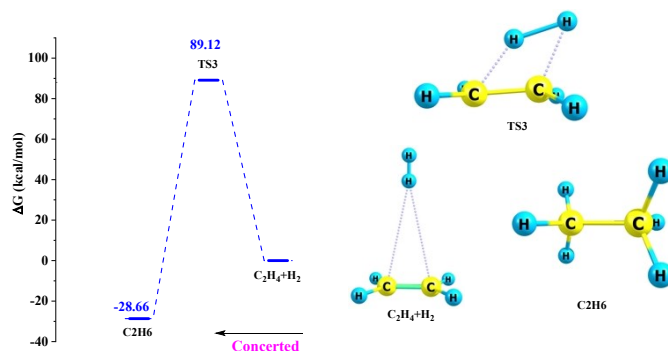

**Figure S3.** The free energy profile of direct hydrogenation of ethylene without any catalyst.

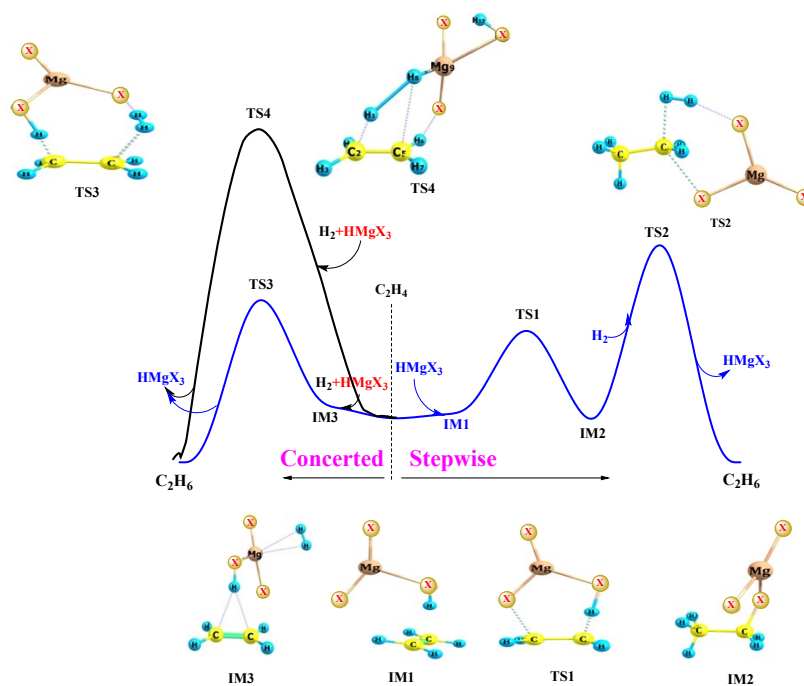

**Scheme S1.** The possible pathways of catalytic hydrogenation of ethene by superacid HA ( $A = \text{MgX}_3, \text{Mg}_2\text{X}_5$ ;  $X = \text{F}, \text{Cl}, \text{Br}$ ) including concerted process (left) and stepwise process (right).

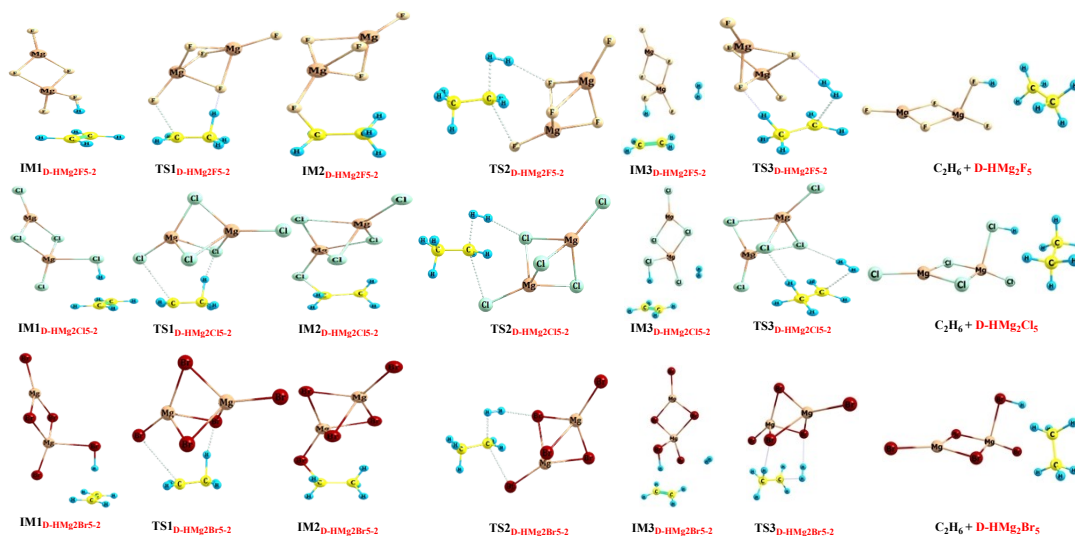

**Figure S4.** The 3D geometries of important intermediates and transition states in process of superacid  $\text{D-HMg}_2\text{X}_5$  ( $X = \text{F}, \text{Cl}, \text{Br}$ ) catalyzed hydrogenation of ethylene along path of  $\text{D-HMg}_2\text{X}_5-2$ .

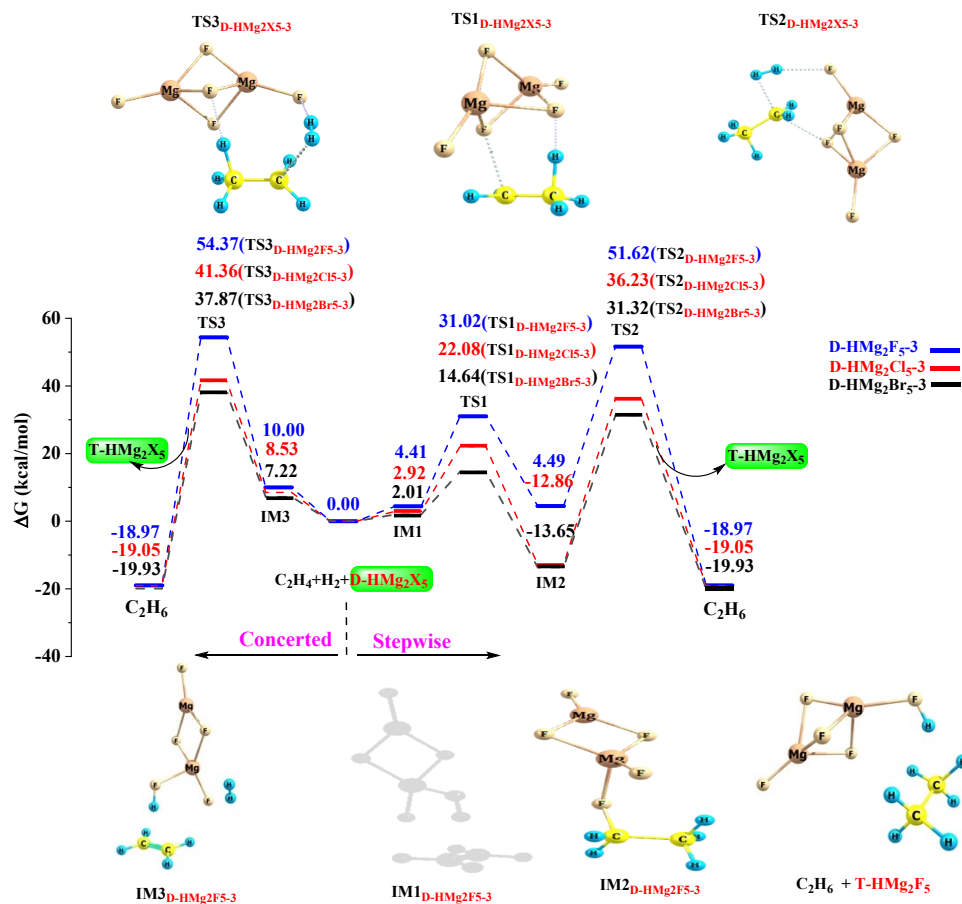

**Figure S5.** The free energy profile of hydrogenation of ethylene catalyzed by superacid  $D\text{-HMg}_2X_5$  ( $X=F, Cl, Br$ ) along path of  $D\text{-HMg}_2X_5-3$ .

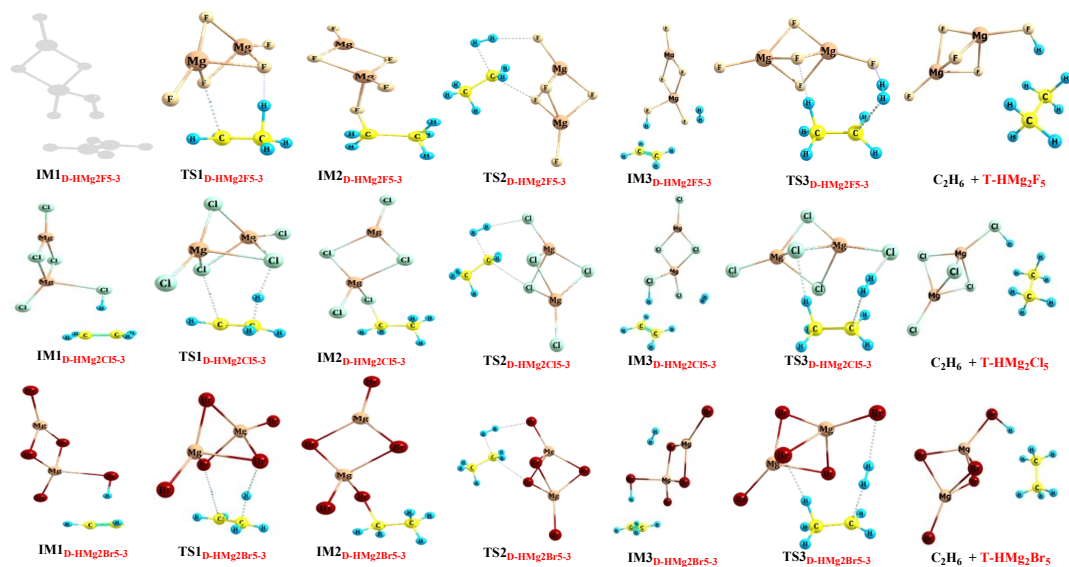

**Figure S6.** The 3D geometries of important intermediates and transition states in process of superacid  $D\text{-HMg}_2X_5$  ( $X=F, Cl, Br$ ) catalyzed hydrogenation of ethylene along path of  $D\text{-HMg}_2X_5-3$ .

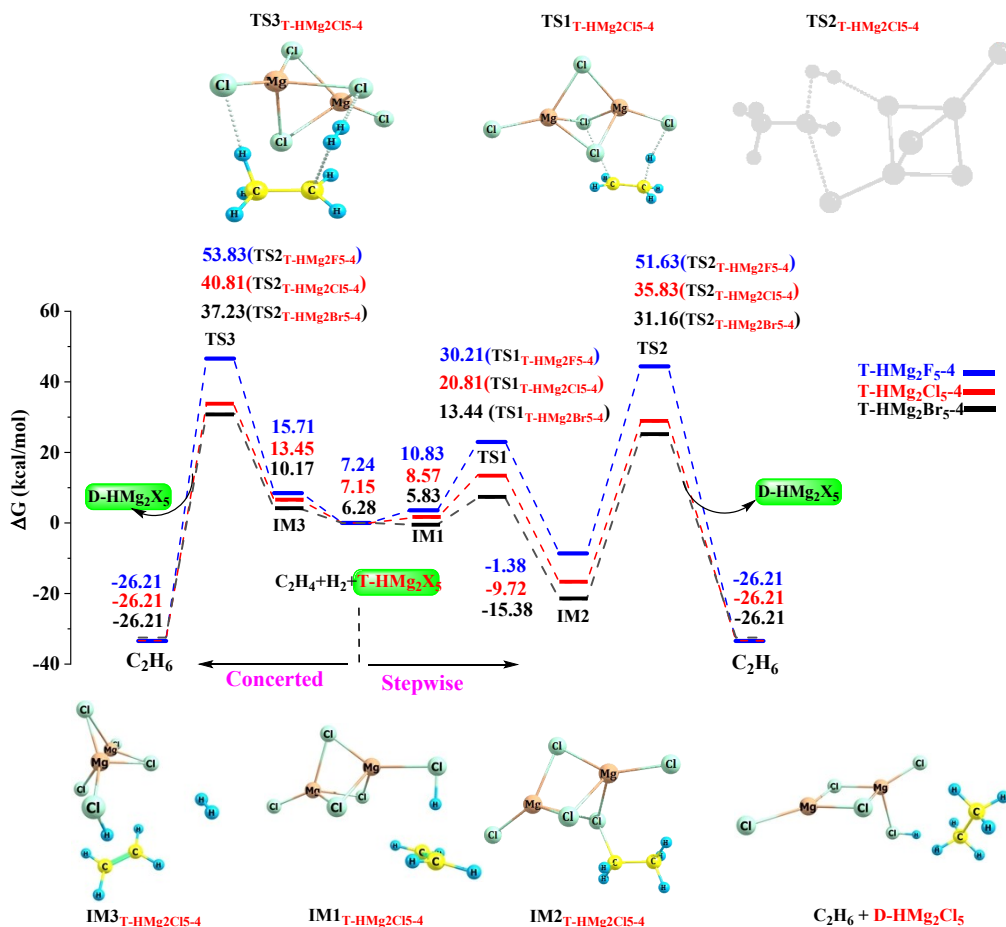

Figure S7. The free energy profile of hydrogenation of ethylene catalyzed by superacid D-HMg<sub>2</sub>X<sub>5</sub> (X = F, Cl, Br) along path of T-HMg<sub>2</sub>X<sub>5</sub>-4.

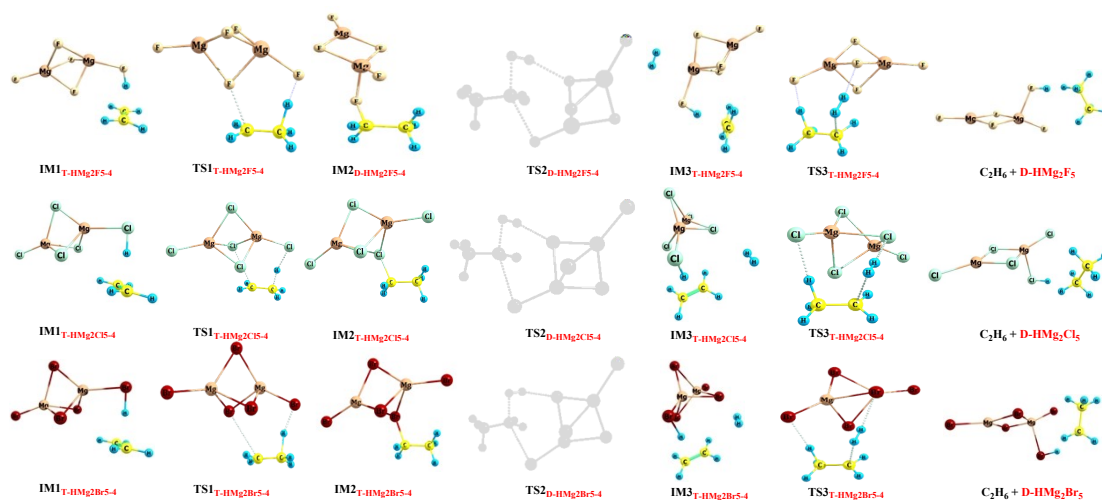

Figure S8. The 3D geometries of important intermediates and transition states in process of superacid HMg<sub>2</sub>X<sub>5</sub> (X = F, Cl, Br) catalyzed hydrogenation of ethylene along path of T-HMg<sub>2</sub>X<sub>5</sub>-4.

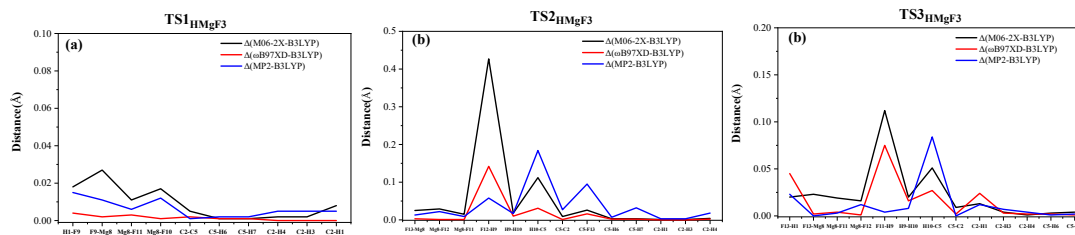

**Figure S9.** For the reaction catalyzed mono-nuclear superacid  $\text{HMgF}_3$ , the distance difference of optimization geometry under various calculated levels including B3LYP/6-311++g(d,p), M06-2X/6-311++g(d,p),  $\omega\text{B97XD}/6-311++g(d,p)$  and MP2/ aug-cc-pVTZ. (a)  $\text{TS1}_{\text{HMgF}_3}$ ; (b)  $\text{TS2}_{\text{HMgF}_3}$ ; (c)  $\text{TS3}_{\text{HMgF}_3}$ .

**Table S2.** The improved catalytic efficiency by superacid HA (A=  $\text{MgX}_3$ ,  $\text{Mg}_2\text{X}_5$ ) and strong acid HX(X=F, Cl, Br) relative to that of no catalyst, HX and  $\text{HMgX}_3$ .

| Relative to     | Paths | HX    | $\text{HMgX}_3$ | $\text{D-HMg}_2\text{X}_5-1$ | $\text{D-HMg}_2\text{X}_5-2$ | $\text{D-HMg}_2\text{X}_5-3$ | $\text{T-HMg}_2\text{X}_5-4$ |
|-----------------|-------|-------|-----------------|------------------------------|------------------------------|------------------------------|------------------------------|
| No catalyst     | F     | 16.8% | 42.8%           | 42.9%                        | 38.8%                        | 39.0%                        | 39.6%                        |
|                 | Cl    | 34.1% | 51.5%           | 52.0%                        | 55.0%                        | 53.6%                        | 54.2%                        |
|                 | Br    | 41.9% | 56.0%           | 55.4%                        | 59.4%                        | 57.5%                        | 58.2%                        |
| HX              | F     |       | 31.3%           | 31.5%                        | 26.5%                        | 26.7%                        | 27.4%                        |
|                 | Cl    |       | 26.4%           | 27.2%                        | 31.7%                        | 29.6%                        | 30.5%                        |
|                 | Br    |       | 24.3%           | 23.1%                        | 30.0%                        | 26.8%                        | 28.1%                        |
| $\text{HMgX}_3$ | F     |       |                 | 0.2%                         | -6.9%                        | -6.7%                        | -5.6%                        |
|                 | Cl    |       |                 | 1.1%                         | 7.3%                         | 4.4%                         | 5.6%                         |
|                 | Br    |       |                 | -1.5%                        | 7.6%                         | 3.4%                         | 5.0%                         |

**Table S3.** The comparison of bond length for  $\text{IM2}_{\text{HMgF}_3}$  under B3LYP/6-311++g(d,p), M06-2X/6-311++g(d,p),  $\omega\text{B97XD}/6-311++g(d,p)$  and MP2/aug-cc-pVTZ levels (Å).

| Bond(Å) | B3LYP | M06-2X | $\omega\text{B97XD}$ | MP2-aug-cc-pVTZ |
|---------|-------|--------|----------------------|-----------------|
| F13-Mg8 | 2.027 | 2.001  | 2.046                | 2.036           |
| Mg8-F12 | 1.807 | 1.792  | 1.808                | 1.797           |
| Mg8-F11 | 1.79  | 1.773  | 1.789                | 1.778           |
| C2-C5   | 1.499 | 1.5    | 1.498                | 1.497           |
| C5-F13  | 1.478 | 1.454  | 1.462                | 1.454           |
| C5-H6   | 1.088 | 1.088  | 1.088                | 1.084           |
| C5-H7   | 1.087 | 1.087  | 1.088                | 1.085           |
| C2-H4   | 1.094 | 1.092  | 1.091                | 1.087           |
| C2-H3   | 1.091 | 1.091  | 1.094                | 1.088           |
| C2-H1   | 1.092 | 1.091  | 1.092                | 1.09            |
| H10-H9  | 0.748 | 0.745  | 0.749                | 0.741           |

**Table S4.** The comparison of bond length for  $\text{TS1}_{\text{HMgF}_3}$  under B3LYP/6-311++g(d,p), M06-2X/6-311++g(d,p),  $\omega\text{B97XD}/6-311++g(d,p)$  and MP2/aug-cc-pVTZ levels (Å).

| Bond (Å) | B3LYP | M06-2X | $\omega\text{B97XD}$ | MP2-aug-cc-pVTZ |
|----------|-------|--------|----------------------|-----------------|
| H1-F9    | 1.286 | 1.268  | 1.282                | 1.271           |
| F9-Mg8   | 1.901 | 1.874  | 1.903                | 1.89            |
| Mg8-F11  | 1.868 | 1.857  | 1.871                | 1.874           |
| Mg8-F10  | 1.793 | 1.776  | 1.794                | 1.781           |
| C2-C5    | 1.39  | 1.395  | 1.388                | 1.391           |

|       |       |       |       |       |
|-------|-------|-------|-------|-------|
| C5-H6 | 1.081 | 1.082 | 1.082 | 1.079 |
| C5-H7 | 1.081 | 1.082 | 1.082 | 1.079 |
| C2-H4 | 1.088 | 1.086 | 1.088 | 1.083 |
| C2-H3 | 1.088 | 1.086 | 1.088 | 1.083 |
| C2-H1 | 1.283 | 1.291 | 1.283 | 1.288 |

**Table S5.** The comparison of bond length for  $\text{TS2}_{\text{HMgF3}}$  under B3LYP/6-311++g(d,p), M06-2X/6-311++g(d,p),  $\omega$ B97XD/6-311++g(d,p) and MP2/aug-cc-pVTZ levels (Å).

| Bond (Å) | B3LYP | M06-2X | $\omega$ B97XD | MP2-aug-cc-pVTZ |
|----------|-------|--------|----------------|-----------------|
| F13-Mg8  | 1.894 | 1.869  | 1.897          | 1.881           |
| Mg8-F12  | 1.882 | 1.853  | 1.881          | 1.860           |
| Mg8-F11  | 1.801 | 1.786  | 1.802          | 2.000           |
| F12-H9   | 1.806 | 2.233  | 1.948          | 1.864           |
| H9-H10   | 0.800 | 0.782  | 0.790          | 0.783           |
| H10-C5   | 1.743 | 1.631  | 1.712          | 1.559           |
| C5-C2    | 1.468 | 1.477  | 1.469          | 1.495           |
| C5-F13   | 2.274 | 2.248  | 2.258          | 2.179           |
| C5-H6    | 1.073 | 1.076  | 1.075          | 1.080           |
| C5-H7    | 1.073 | 1.076  | 1.075          | 1.105           |
| C2-H1    | 1.089 | 1.088  | 1.089          | 1.086           |
| C2-H3    | 1.089 | 1.088  | 1.089          | 1.086           |
| C2-H4    | 1.104 | 1.1    | 1.102          | 1.086           |

**Table S6.** The comparison of bond length for  $\text{TS3}_{\text{HMgF3}}$  under B3LYP/6-311++g(d,p), M06-2X/6-311++g(d,p),  $\omega$ B97XD/6-311++g(d,p) and MP2/aug-cc-pVTZ levels (Å).

| Bond (Å) | B3LYP | M06-2X | $\omega$ B97XD | MP2-aug-cc-pVTZ |
|----------|-------|--------|----------------|-----------------|
| F13-H1   | 1.316 | 1.336  | 1.361          | 1.293           |
| F13-Mg8  | 1.900 | 1.877  | 1.898          | 1.900           |
| Mg8-F11  | 1.860 | 1.841  | 1.864          | 1.857           |
| Mg8-F12  | 1.797 | 1.781  | 1.798          | 1.785           |
| F11-H9   | 1.553 | 1.665  | 1.628          | 1.557           |
| H9-H10   | 0.813 | 0.793  | 0.797          | 0.805           |
| H10-C5   | 1.754 | 1.703  | 1.781          | 1.670           |
| C5-C2    | 1.400 | 1.409  | 1.402          | 1.400           |
| C2-H1    | 1.253 | 1.240  | 1.229          | 1.265           |
| C2-H3    | 1.090 | 1.086  | 1.087          | 1.083           |
| C2-H4    | 1.088 | 1.089  | 1.090          | 1.084           |
| C5-H6    | 1.083 | 1.086  | 1.085          | 1.082           |
| C5-H7    | 1.085 | 1.089  | 1.086          | 1.083           |

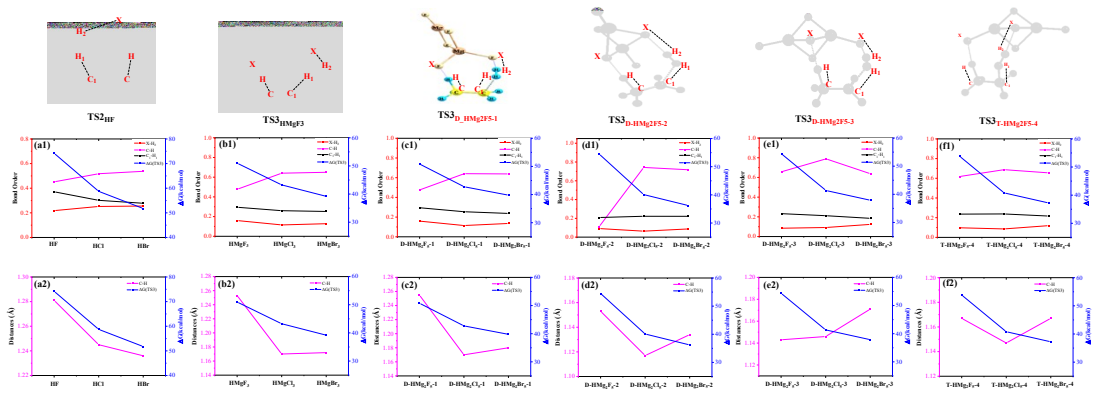

**Figure S10.** (a1 - f1) The relationship between bond order of partial bonds (X-H<sub>2</sub>, C<sub>1</sub>-H<sub>1</sub>, C-H) and barrier energies for transition state (TS3) along the order of halogen ligands, F, Cl and Br under the same geometries. (a2 - f2) The relationship between distance of partial bond and barrier energies along the order of F, Cl and Br.

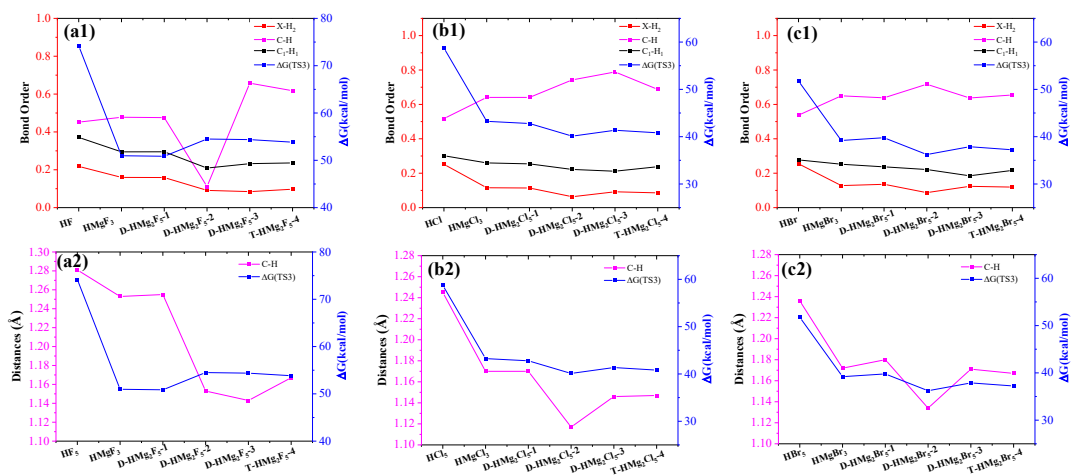

**Figure S11.** (a1 - c1) The relationship between Bond order of partial bonds (X-H<sub>2</sub>, C<sub>1</sub>-H<sub>1</sub>, C-H) and barrier energies for TS3 with the increase of acid geometry size. (a2 - c2) The relationship between distance of partial bond and barrier energies.

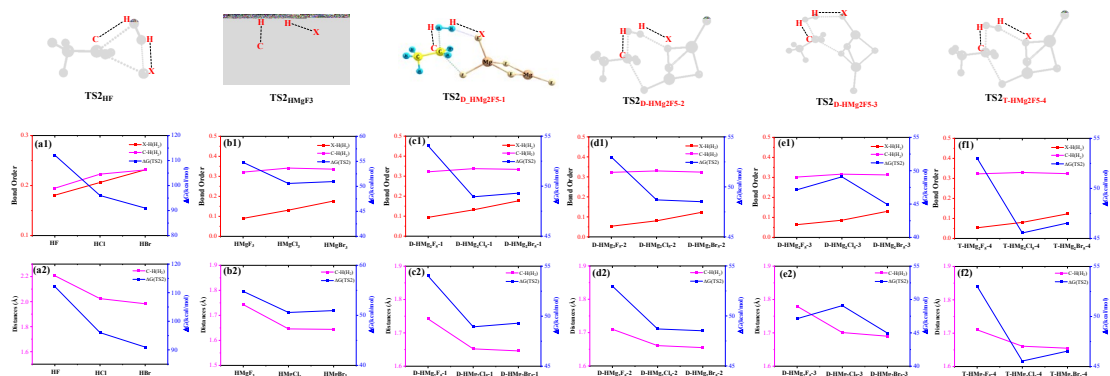

**Figure S12.** (a1 - f1) The relationship between bond order of partial bonds (X-H, C-H) and barrier energies for transition state (TS2) along the order of halogen ligands, F, Cl and Br under the same geometries. (a2 - f2) The relationship between distance of partial bond and barrier energy along the order of F, Cl and Br.

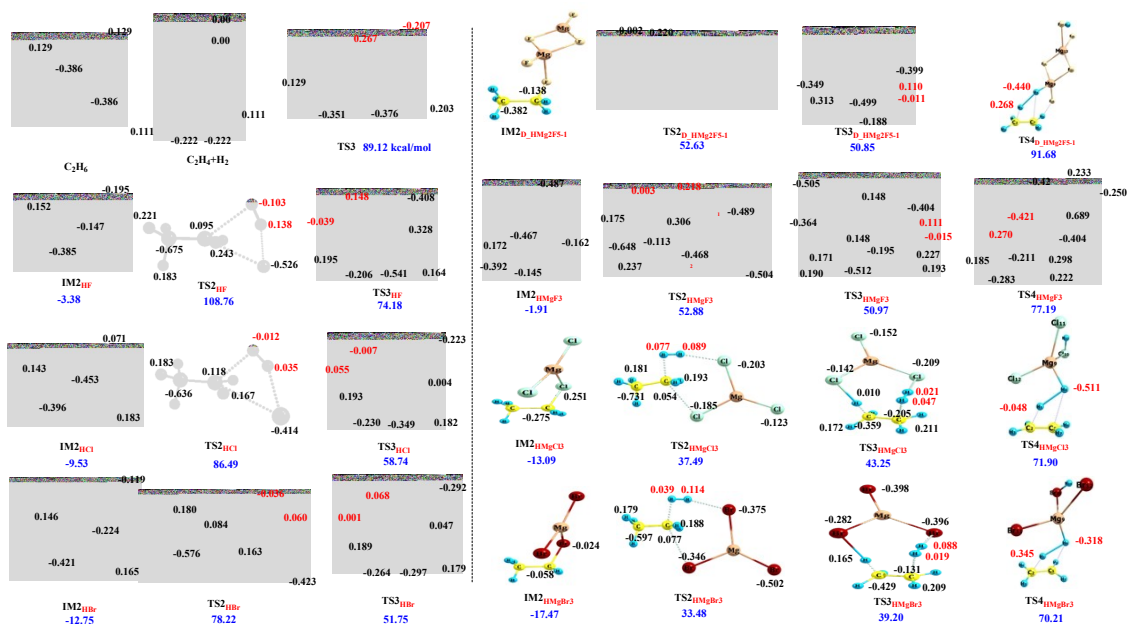

Figure S13. The Mulliken charge distribution in partial transition states and intermediates.

#### Cartesian Coordinates of the Stationary Points

##### C<sub>2</sub>H<sub>4</sub>

|   |             |             |             |
|---|-------------|-------------|-------------|
| C | -0.66452200 | 0.00000000  | 0.00009600  |
| H | -1.23480800 | -0.92291000 | -0.00038500 |
| H | -1.23480400 | 0.92291300  | -0.00038900 |
| C | 0.66448800  | 0.00000000  | 0.00023900  |
| H | 1.23490900  | 0.92284200  | -0.00061600 |
| H | 1.23490800  | -0.92284400 | -0.00062000 |

##### C<sub>2</sub>H<sub>6</sub>

|   |             |             |             |
|---|-------------|-------------|-------------|
| H | -1.16278800 | -1.01107000 | -0.12408200 |
| C | -0.76507200 | 0.00000200  | 0.00000200  |
| H | -1.16288700 | 0.61295100  | -0.81355200 |
| H | -1.16287100 | 0.39802100  | 0.93763700  |
| C | 0.76507600  | 0.00000700  | 0.00000100  |
| H | 1.16289300  | -0.61336900 | 0.81323100  |
| H | 1.16278300  | 1.01102000  | 0.12456500  |
| H | 1.16285000  | -0.39760900 | -0.93781700 |

##### TS3

|   |             |             |             |
|---|-------------|-------------|-------------|
| C | 0.61319100  | 0.00006400  | -0.18888200 |
| H | 1.09151100  | 0.91196300  | -0.52319700 |
| H | 1.09184200  | -0.91077900 | -0.52552100 |
| C | -0.82223400 | 0.00001200  | -0.03324300 |
| H | -1.34624700 | -0.93227500 | 0.11559300  |
| H | -1.34640500 | 0.93217100  | 0.11582700  |
| H | 0.27915400  | -0.00092700 | 0.99912600  |
| H | 1.48440800  | -0.00060900 | 1.15092400  |

##### HF

|   |            |            |             |
|---|------------|------------|-------------|
| H | 0.00000000 | 0.00000000 | -0.83000700 |
| F | 0.00000000 | 0.00000000 | 0.09222300  |

##### HCl

|    |            |            |             |
|----|------------|------------|-------------|
| H  | 0.00000000 | 0.00000000 | -1.21482800 |
| Cl | 0.00000000 | 0.00000000 | 0.07146000  |

##### HBr

|    |            |            |             |
|----|------------|------------|-------------|
| H  | 0.00000000 | 0.00000000 | -1.38754500 |
| Br | 0.00000000 | 0.00000000 | 0.03964400  |

##### IM1<sub>HF</sub>

|   |             |             |             |
|---|-------------|-------------|-------------|
| H | -0.99364400 | 0.00058600  | -0.00013000 |
| C | 1.14402600  | -0.66648400 | 0.00005300  |
| H | 1.14986800  | -1.23612700 | -0.92324100 |
| H | 1.14929400  | -1.23623400 | 0.92330700  |
| C | 1.14535000  | 0.66600400  | 0.00009900  |
| H | 1.15176500  | 1.23562800  | 0.92339700  |
| H | 1.15234500  | 1.23572400  | -0.92316300 |
| F | -1.92732000 | 0.00036700  | -0.00012000 |

##### IM2<sub>HF</sub>

|   |             |             |             |
|---|-------------|-------------|-------------|
| H | 1.26919700  | -0.85780600 | -0.88659700 |
| C | 1.19528600  | -0.22457600 | -0.00003100 |
| H | 2.04106000  | 0.46986700  | -0.00135100 |
| H | 1.26982600  | -0.85612000 | 0.88797100  |
| C | -0.10278900 | 0.55027600  | 0.00001800  |
| H | -0.20463800 | 1.17555300  | 0.89039600  |
| H | -0.20508700 | 1.17589600  | -0.89004100 |
| F | -1.19170400 | -0.34017700 | -0.00003400 |

##### TS1<sub>HF</sub>

|   |             |             |             |
|---|-------------|-------------|-------------|
| H | 0.12615300  | -0.83064300 | 0.00063900  |
| C | -1.10939100 | -0.41904700 | -0.00001300 |
| H | -1.57717300 | -0.74059000 | 0.92373200  |
| H | -1.57599600 | -0.74114700 | -0.92415900 |
| C | -0.35868400 | 0.76310200  | -0.00005800 |
| H | -0.11114600 | 1.27847800  | -0.91881000 |



|   |             |             |            |
|---|-------------|-------------|------------|
| H | -0.11150600 | 1.27865000  | 0.91870000 |
| F | 1.33979100  | -0.25656400 | 0.00003600 |

**TS2<sub>HF</sub>**

|   |             |             |             |
|---|-------------|-------------|-------------|
| H | -2.38344800 | 0.18594400  | -0.90879200 |
| C | -1.86214900 | -0.11788900 | -0.00009700 |
| H | -1.86876900 | -1.22966900 | 0.00269400  |
| H | -2.38408400 | 0.18997700  | 0.90692800  |
| C | -0.44368600 | 0.18951400  | -0.00006500 |
| H | 0.13238900  | 0.21983400  | 0.90977900  |
| H | 0.13304000  | 0.21861200  | -0.90957100 |
| H | 1.02611300  | 1.83630000  | -0.00087400 |
| H | 1.51580100  | 1.17384700  | 0.00048200  |
| F | 1.96266300  | -0.33606600 | 0.00003600  |

**TS3<sub>HF</sub>**

|   |             |             |             |
|---|-------------|-------------|-------------|
| H | 0.52839100  | 0.54726700  | 0.00088200  |
| C | -0.72781100 | 0.79963500  | -0.00017900 |
| H | -0.86167900 | 1.36495200  | 0.91891600  |
| H | -0.86058800 | 1.36405200  | -0.91996900 |
| C | -1.21649800 | -0.51964400 | 0.00019200  |
| H | -1.55706500 | -0.99228400 | -0.91458200 |
| H | -1.55715700 | -0.99195900 | 0.91509900  |
| H | 0.04504700  | -1.60299600 | -0.00107900 |
| H | 0.76629200  | -1.14192000 | -0.00007800 |
| F | 1.68473500  | -0.02522900 | 0.00008200  |

**IM1<sub>HCl</sub>**

|    |             |             |             |
|----|-------------|-------------|-------------|
| H  | 0.43874600  | -0.00156800 | -0.00183800 |
| C  | -1.87425400 | -0.66525900 | 0.00030900  |
| H  | -1.87539200 | -1.23507500 | 0.92343400  |
| H  | -1.88280700 | -1.23533700 | -0.92274600 |
| C  | -1.87069300 | 0.66634500  | 0.00024000  |
| H  | -1.87648200 | 1.23619400  | -0.92285200 |
| H  | -1.86908900 | 1.23653000  | 0.92331100  |
| Cl | 1.73733600  | -0.00042700 | -0.00015300 |

**IM2<sub>HCl</sub>**

|    |             |             |             |
|----|-------------|-------------|-------------|
| H  | 1.56808000  | -0.99508300 | -0.88575900 |
| C  | 1.61443300  | -0.35905000 | 0.00000300  |
| H  | 2.57702300  | 0.16256000  | -0.00022700 |
| H  | 1.56855500  | -0.99472500 | 0.88605300  |
| C  | 0.49291700  | 0.65954400  | 0.00003000  |
| H  | 0.51033400  | 1.29015700  | 0.88694500  |
| H  | 0.51017200  | 1.28947800  | -0.88745900 |
| Cl | -1.13989800 | -0.15031500 | 0.00001500  |

**IM3<sub>HCl</sub>**

|    |             |             |             |
|----|-------------|-------------|-------------|
| H  | 0.39654400  | -0.23178000 | 0.00001000  |
| C  | -1.95081000 | -0.76436500 | -0.00020100 |
| H  | -1.99845100 | -1.33199100 | -0.92352800 |
| H  | -1.99841900 | -1.33261300 | 0.92274500  |
| C  | -1.84751100 | 0.56316700  | 0.00024400  |
| H  | -1.80531900 | 1.13192200  | 0.92298100  |
| H  | -1.80535100 | 1.13254100  | -0.92211000 |
| H  | 0.36345800  | 3.37789900  | -0.00044100 |
| H  | 0.80852500  | 2.78064800  | -0.00036800 |
| Cl | 1.69582000  | -0.25408500 | 0.00002600  |

**TS1<sub>HCl</sub>**

|    |             |             |             |
|----|-------------|-------------|-------------|
| H  | -0.34996200 | -0.77757700 | 0.00101100  |
| C  | -1.59209500 | -0.55631400 | -0.00007800 |
| H  | -1.96549600 | -0.98307800 | 0.92460800  |
| H  | -1.96559800 | -0.98280600 | -0.92504700 |
| C  | -1.15962000 | 0.77039300  | 0.00004000  |
| H  | -0.97239300 | 1.30784000  | -0.92065300 |
| H  | -0.97250500 | 1.30766300  | 0.92087300  |
| Cl | 1.33742600  | -0.06803100 | -0.00003300 |

**TS2<sub>HCl</sub>**

|    |             |             |             |
|----|-------------|-------------|-------------|
| H  | -3.03787600 | 0.08677200  | -0.90464800 |
| C  | -2.50199200 | -0.20445900 | -0.00002800 |
| H  | -2.47382000 | -1.31295100 | 0.00096000  |
| H  | -3.03811100 | 0.08814400  | 0.90403500  |
| C  | -1.10141600 | 0.20167800  | -0.00004200 |
| H  | -0.53526200 | 0.24456300  | 0.91616200  |
| H  | -0.53517800 | 0.24461700  | -0.91619800 |
| H  | -0.05717200 | 1.93539600  | 0.00004000  |
| H  | 0.65920100  | 1.56774900  | 0.00004800  |
| Cl | 1.80227500  | -0.16691800 | 0.00000200  |

**TS3<sub>HCl</sub>**

|    |             |             |             |
|----|-------------|-------------|-------------|
| H  | -0.06948600 | 0.53790700  | -0.00040300 |
| C  | -1.28838800 | 0.79081600  | 0.00015100  |
| H  | -1.37505400 | 1.36909100  | 0.91754600  |
| H  | -1.37527200 | 1.37008600  | -0.91659100 |
| C  | -1.88899100 | -0.47720100 | -0.00025000 |
| H  | -2.23374400 | -0.93743100 | -0.91917700 |
| H  | -2.23419900 | -0.93746600 | 0.91847900  |
| H  | -0.61129600 | -1.62766500 | 0.00111600  |
| H  | 0.16119900  | -1.36824800 | 0.00031700  |
| Cl | 1.57659600  | -0.01693900 | -0.00004100 |

**IM1<sub>HBr</sub>**

|    |             |             |             |
|----|-------------|-------------|-------------|
| H  | 0.24120200  | -0.00012900 | 0.00024600  |
| C  | 2.60361500  | -0.66566500 | -0.00001300 |
| H  | 2.60634300  | -1.23563000 | -0.92306200 |
| H  | 2.60669100  | -1.23559700 | 0.92304400  |
| C  | 2.60365900  | 0.66565700  | -0.00002000 |
| H  | 2.60677800  | 1.23562500  | 0.92303000  |
| H  | 2.60643000  | 1.23559100  | -0.92307500 |
| Br | -1.19746000 | 0.00000500  | 0.00000000  |

**IM2<sub>HBr</sub>**

|    |             |             |             |
|----|-------------|-------------|-------------|
| H  | 1.99889900  | -1.03672700 | 0.88297100  |
| C  | 2.08637700  | -0.40192400 | 0.00009100  |
| H  | 2.00478200  | -1.03134900 | -0.88783700 |
| H  | 3.08105800  | 0.05718000  | 0.00453000  |
| C  | 1.03610600  | 0.68895600  | -0.00017500 |
| H  | 1.08051900  | 1.31343800  | 0.88911900  |
| H  | 1.08160400  | 1.31504800  | -0.88774300 |
| Br | -0.79947900 | -0.06685100 | -0.00001500 |

**IM3<sub>HBr</sub>**

|   |             |             |             |
|---|-------------|-------------|-------------|
| C | -2.59270800 | -0.82900700 | -0.00007300 |
| H | -2.60633800 | -1.39867200 | -0.92322100 |

|    |             |             |             |
|----|-------------|-------------|-------------|
| H  | -2.60632100 | -1.39890100 | 0.92293300  |
| C  | -2.56699800 | 0.50210000  | 0.00009100  |
| H  | -2.55769400 | 1.07254800  | 0.92263000  |
| H  | -2.55771000 | 1.07277500  | -0.92230800 |
| H  | -0.63672200 | 3.48025800  | -0.00015800 |
| H  | -0.13368800 | 2.93101000  | -0.00013700 |
| Br | 1.20819500  | -0.10395700 | 0.00000400  |
| H  | -0.23010900 | -0.15908800 | 0.00000100  |

**TS1<sub>HBr</sub>**

|    |             |             |             |
|----|-------------|-------------|-------------|
| H  | -0.88563000 | -0.79383300 | 0.00023300  |
| C  | -2.11814700 | -0.59686000 | -0.00001200 |
| H  | -2.47080000 | -1.04567700 | 0.92378900  |
| H  | -2.47021700 | -1.04582300 | -0.92392800 |
| C  | -1.81508100 | 0.76708600  | -0.00004200 |
| H  | -1.66495500 | 1.31588100  | -0.92136800 |
| H  | -1.66560100 | 1.31604200  | 0.92130100  |
| Br | 0.93590200  | -0.02194100 | 0.00000800  |

**TS2<sub>HBr</sub>**

|    |             |             |             |
|----|-------------|-------------|-------------|
| H  | -3.72903300 | 0.04754900  | -0.90256500 |
| C  | -3.18483200 | -0.23521300 | 0.00001100  |
| H  | -3.13549400 | -1.34180100 | -0.00016100 |
| H  | -3.72894500 | 0.04730400  | 0.90271200  |
| C  | -1.79570000 | 0.21942900  | -0.00000900 |
| H  | -1.23218400 | 0.27203100  | 0.91736600  |
| H  | -1.23223500 | 0.27206700  | -0.91741200 |
| H  | -0.83610000 | 1.95462200  | 0.00005900  |
| H  | -0.08217700 | 1.66953700  | -0.00002600 |
| Br | 1.25312500  | -0.08076000 | 0.00000000  |

**TS3<sub>HBr</sub>**

|    |             |             |             |
|----|-------------|-------------|-------------|
| C  | -1.90767500 | 0.78713800  | 0.00002700  |
| H  | -1.98405300 | 1.36972300  | 0.91584300  |
| H  | -1.98435900 | 1.36990200  | -0.91565700 |
| C  | -2.54433000 | -0.46335300 | 0.00000300  |
| H  | -2.88811200 | -0.92185300 | -0.91986600 |
| H  | -2.88815600 | -0.92194900 | 0.91980700  |
| H  | -1.24636400 | -1.64704700 | -0.00022400 |
| H  | -0.46852200 | -1.44005900 | 0.00026900  |
| Br | 1.11059400  | -0.00800100 | -0.00000100 |
| H  | -0.69919500 | 0.52860300  | -0.00030600 |

**HMgF<sub>3</sub>**

|    |             |             |             |
|----|-------------|-------------|-------------|
| H  | 1.66610800  | 0.26318400  | -0.00041000 |
| Mg | -0.37261400 | -0.12756100 | 0.00012300  |
| F  | 1.24091100  | 1.16915500  | 0.00000100  |
| F  | -2.13641900 | 0.09616100  | -0.00008300 |
| F  | 1.20720300  | -1.12447800 | -0.00003500 |

**HMgCl<sub>3</sub>**

|    |             |             |             |
|----|-------------|-------------|-------------|
| Cl | -2.43989400 | -0.34429800 | -0.00008800 |
| Cl | 1.81102400  | -1.34464700 | -0.00019500 |
| Cl | 0.69276400  | 1.95712900  | 0.00032600  |
| Mg | -0.24591100 | -0.49628400 | -0.00008300 |
| H  | 1.86473600  | 1.39630100  | 0.00024900  |

**HMgBr<sub>3</sub>**

|    |             |             |             |
|----|-------------|-------------|-------------|
| Mg | 0.15114800  | -0.58658600 | -0.00000300 |
| H  | -1.78614100 | 1.81178500  | 0.00001300  |
| Br | 2.49905600  | -0.70598000 | 0.00000000  |
| Br | -2.10939700 | -1.29213100 | 0.00000000  |
| Br | -0.39044900 | 2.14746100  | 0.00000000  |

**IM1<sub>HMgF3</sub>**

|    |             |             |             |
|----|-------------|-------------|-------------|
| H  | 1.01303100  | -0.88509600 | -0.11948500 |
| C  | 2.77322200  | -0.37530600 | 0.57389600  |
| H  | 3.37687600  | -1.27641400 | 0.61123200  |
| H  | 2.39268900  | 0.00264100  | 1.51773700  |
| C  | 2.54276700  | 0.27775500  | -0.57031000 |
| H  | 1.93653100  | 1.17840000  | -0.58342800 |
| H  | 2.94888500  | -0.08023000 | -1.51149700 |
| Mg | -1.33749200 | 0.20614400  | 0.02264500  |
| F  | 0.10065700  | -1.22705900 | -0.15355600 |
| F  | -3.00964200 | -0.43084900 | 0.00618200  |
| F  | -0.14813100 | 1.56593900  | 0.12428300  |

**IM2<sub>HMgF3</sub>**

|    |             |             |             |
|----|-------------|-------------|-------------|
| H  | 1.79268700  | 0.86692400  | 1.12012200  |
| C  | 2.37115400  | 0.02340400  | 0.74083800  |
| H  | 2.41947600  | -0.77597000 | 1.48278800  |
| H  | 3.39049600  | 0.37217000  | 0.54810000  |
| C  | 1.78970800  | -0.46319000 | -0.55313200 |
| H  | 1.63686300  | 0.33439700  | -1.27591700 |
| H  | 2.30492700  | -1.31743200 | -0.98710000 |
| Mg | -1.17652800 | 0.21546300  | -0.01172300 |
| F  | -0.23320800 | 1.74353700  | -0.20931100 |
| F  | -2.68845300 | -0.69220000 | 0.29536500  |
| F  | 0.43374000  | -0.98766300 | -0.29422700 |

**IM3<sub>HMgF3</sub>**

|    |             |             |             |
|----|-------------|-------------|-------------|
| H  | 1.06930000  | -0.87231400 | 0.20723600  |
| C  | 2.83366100  | -0.45346000 | -0.56300700 |
| H  | 3.44326400  | -1.34856000 | -0.49264500 |
| H  | 2.43938900  | -0.20190500 | -1.54269200 |
| C  | 2.61027100  | 0.33820100  | 0.49133000  |
| H  | 1.99583100  | 1.22853400  | 0.39709800  |
| H  | 3.02982700  | 0.10499700  | 1.46529800  |
| Mg | -1.28286800 | 0.19375000  | -0.09045900 |
| H  | -1.49585100 | 0.74685700  | 2.16208600  |
| H  | -2.11594800 | 0.34541200  | 2.02869300  |
| F  | -0.08523200 | 1.53784100  | -0.30703800 |
| F  | -2.92280800 | -0.51162400 | -0.28018500 |
| F  | 0.15970700  | -1.20804700 | 0.28616700  |

**TS1<sub>HMgF3</sub>**

|    |             |             |             |
|----|-------------|-------------|-------------|
| H  | 1.20325000  | 1.03330400  | 0.00001100  |
| C  | 2.41058300  | 0.59843800  | 0.00001100  |
| H  | 2.77431100  | 1.04781900  | 0.92174100  |
| H  | 2.77431500  | 1.04783300  | -0.92171100 |
| C  | 2.22364700  | -0.77930800 | 0.00000000  |
| H  | 2.23981800  | -1.35485000 | -0.91520400 |
| H  | 2.23981300  | -1.35486300 | 0.91519600  |
| Mg | -1.17809500 | -0.01740300 | -0.00000300 |
| F  | -0.00381000 | 1.47754300  | 0.00001200  |
| F  | -2.96915800 | -0.10923100 | -0.00001100 |

F 0.20632900 -1.27111000 -0.00000800

**TS2<sub>HMGf3</sub>**

H 3.75224400 -0.20778800 0.90290500  
C 3.17925100 -0.41507200 0.00000300  
H 2.94143700 -1.49290400 -0.00002600  
H 3.75225100 -0.20774200 -0.90288400  
C 1.83829200 0.18169200 0.00001300  
H 1.28843800 0.27550300 -0.91630900  
H 1.28843100 0.27545500 0.91633500  
Mg -1.34202600 -0.04280300 -0.00000700  
H 1.38663900 1.95380700 0.00005300  
H 2.18451800 1.88960800 0.00006000  
F -3.11451200 -0.36003000 -0.00000500  
F -0.37946800 1.57432900 0.00002100  
F 0.09454600 -1.27785800 -0.00003200

**TS3<sub>HMGf3</sub>**

H -1.28350400 -0.97839900 -0.02211800  
C -2.47954600 -0.82665800 0.31921100  
H -2.95879500 -1.63044100 -0.23638000  
H -2.36726300 -0.99931600 1.38909400  
C -2.85953900 0.47373200 -0.03422200  
H -2.79554900 1.29006500 0.67484000  
H -3.46627400 0.66627600 -0.91253700  
Mg 1.37420000 0.04347300 -0.01464200  
H -1.00177100 1.46162100 -0.64552000  
H -1.68717500 1.29378700 -1.04847800  
F 0.34440000 1.58699800 0.11869500  
F 3.13098900 -0.31586600 0.10118500  
F -0.01934000 -1.21643400 -0.30134000

**IM1<sub>HMGCl3</sub>**

Cl -3.19073300 -0.47953400 -0.00015400  
Cl 0.27729600 2.09959400 0.00028900  
Cl 0.37624000 -1.60880200 -0.00018200  
H 1.57095300 -1.01470800 -0.00008000  
C 3.69418500 -0.89419500 0.00024200  
H 3.89217200 -1.42912900 -0.92300600  
H 3.89188700 -1.42860500 0.92385900  
C 3.25962000 0.36803500 -0.00018000  
H 3.07324900 0.91251900 0.91829600  
H 3.07354000 0.91200100 -0.91902700  
Mg -1.17435600 0.41779100 0.00003200

**IM2<sub>HMGCl3</sub>**

Cl -2.94255000 -0.59990400 0.21990400  
Cl 0.65612400 -1.45458000 -0.32061000  
Cl 0.31725500 2.21220100 -0.14408400  
H 2.26639300 0.40594600 1.42569900  
C 2.88343200 -0.33258000 0.91330900  
H 2.97534500 -1.22869100 1.52872800  
H 3.88102200 0.09901000 0.78292300  
C 2.33094100 -0.64665500 -0.45386700  
H 2.15472300 0.24123300 -1.05398400  
H 2.91249100 -1.38262600 -1.00329300  
Mg -1.00002500 0.42161300 -0.02294200

**IM3<sub>HMGCl3</sub>**

Cl 0.52716000 1.97311200 -0.06652000  
Cl -3.16225800 -0.28983100 -0.20766600  
Cl 0.31178500 -1.71594000 0.06387800  
H 1.52377400 -1.15569500 0.01084600  
C 3.30442800 -0.29358000 -0.76608600  
H 3.77156100 -1.09415400 -1.33055200  
H 2.79820600 0.48476000 -1.32686700  
C 3.36119600 -0.24993900 0.56713100  
H 2.90396000 0.56632600 1.11594500  
H 3.87807800 -1.01223700 1.14121300  
Mg -1.08172300 0.42808700 0.03810600  
H -0.87912800 0.64532600 2.36852000  
H -1.51321900 0.24495900 2.33258400

**TS1<sub>HMGCl3</sub>**

Cl -3.22230500 0.00093700 -0.00000900  
Cl 0.54245000 -1.80537700 -0.00000500  
Cl 0.34510200 1.80794900 0.00000700  
H 1.85219700 1.03677900 0.00000900  
C 3.11168700 0.72925600 0.00001300  
H 3.39047700 1.23188900 0.92334600  
H 3.39048300 1.23189600 -0.92331500  
C 3.06914300 -0.64835000 0.00000700  
H 3.06857900 -1.21963100 -0.91879200  
H 3.06857300 -1.21963700 0.91880200  
Mg -1.01370800 -0.13386600 -0.00000400

**TS2<sub>HMGCl3</sub>**

Cl -3.28823900 -0.35758400 -0.00003400  
Cl 0.54161000 -1.70008100 0.00004500  
Cl 0.01163900 2.03903200 0.00000900  
H 4.41679200 -0.24215100 0.89968300  
C 3.84216500 -0.46034500 -0.00009600  
H 3.62680500 -1.53807200 -0.00011600  
H 4.41663500 -0.24208900 -0.89996100  
C 2.50901400 0.17902200 0.00004000  
H 1.94838000 0.27180400 -0.91418500  
H 1.94854500 0.27175000 0.91437700  
Mg -1.09477200 -0.02082300 0.00000600  
H 2.19545200 1.97488600 0.00009200  
H 2.97240800 1.75844500 0.00004600

**TS3<sub>HMGCl3</sub>**

Cl -0.35707100 1.86217000 -0.06302200  
Cl 3.29690800 -0.03786400 0.16706300  
Cl -0.30971900 -1.79772900 -0.27668600  
H -1.95095400 -0.99826000 0.40770300  
C -2.94400900 -0.54902500 0.83243000  
H -3.56385700 -1.43535500 0.96589800  
H -2.61082900 -0.07599500 1.75537800  
C -3.41797000 0.36072000 -0.14386100  
H -3.21563400 1.42194500 -0.06230600  
H -4.16451100 0.06517800 -0.87482800  
Mg 1.08976900 0.06918000 -0.04036800  
H -1.77560600 0.66202700 -1.29803800  
H -2.33597300 0.20830800 -1.60584700

**IM1<sub>HMgBr3</sub>**

|    |             |             |             |
|----|-------------|-------------|-------------|
| H  | -1.93411200 | -1.29458600 | -0.00016100 |
| C  | -4.09191600 | -1.32946100 | 0.00110200  |
| H  | -4.23887700 | -1.87958100 | 0.92488400  |
| H  | -4.24007600 | -1.88057100 | -0.92192100 |
| C  | -3.77737700 | -0.03223500 | 0.00025400  |
| H  | -3.64307800 | 0.52575100  | -0.91920200 |
| H  | -3.64185500 | 0.52671200  | 0.91897300  |
| Mg | 0.79407800  | 0.52359700  | -0.00000900 |
| Br | -0.55906000 | -1.82454500 | -0.00041500 |
| Br | 3.04282400  | -0.18693400 | 0.00027200  |
| Br | -0.90134100 | 2.17974500  | -0.00015900 |

**IM2<sub>HMgBr3</sub>**

|    |             |             |             |
|----|-------------|-------------|-------------|
| H  | 2.60146600  | -0.05562100 | 1.58315500  |
| C  | 3.14820500  | -0.85772300 | 1.08714800  |
| H  | 3.11863200  | -1.75770300 | 1.70281100  |
| H  | 4.19250700  | -0.54012600 | 0.99406100  |
| C  | 2.61477900  | -1.10439900 | -0.30112800 |
| H  | 2.55660000  | -0.20330800 | -0.90438300 |
| H  | 3.11890900  | -1.90591100 | -0.83456200 |
| Mg | -0.67189600 | 0.52869900  | -0.02816700 |
| Br | 1.01293000  | 2.20369600  | -0.10608600 |
| Br | -2.91919000 | -0.16806700 | 0.14752000  |
| Br | 0.70331000  | -1.75302800 | -0.23912600 |

**IM3<sub>HMgBr3</sub>**

|    |             |             |             |
|----|-------------|-------------|-------------|
| H  | 1.84583900  | -1.41404300 | -0.01987900 |
| C  | 3.71605200  | -0.64672100 | -0.78223100 |
| H  | 4.12831000  | -1.46563900 | -1.36272400 |
| H  | 3.26171100  | 0.17305400  | -1.32820500 |
| C  | 3.77702700  | -0.63158500 | 0.55126100  |
| H  | 3.37491100  | 0.20209500  | 1.11684000  |
| H  | 4.24219100  | -1.43690100 | 1.11042200  |
| Mg | -0.73163100 | 0.52124900  | 0.09933200  |
| H  | -0.42706600 | 0.65400700  | 2.47154400  |
| H  | -1.10151700 | 0.32547500  | 2.45218900  |
| Br | -3.03044300 | 0.00297000  | -0.11333300 |
| Br | 1.10054800  | 2.03829200  | -0.03563400 |
| Br | 0.45837200  | -1.91621100 | 0.02764300  |

**TS1<sub>HMgBr3</sub>**

|    |             |             |             |
|----|-------------|-------------|-------------|
| H  | -2.22750000 | -1.17426600 | 0.00019900  |
| C  | -3.55394800 | -0.93956400 | 0.00021200  |
| H  | -3.77879800 | -1.46746100 | 0.92346100  |
| H  | -3.77885600 | -1.46770100 | -0.92288600 |
| C  | -3.59016900 | 0.43141600  | 0.00003400  |
| H  | -3.60455600 | 1.00184900  | -0.91934500 |
| H  | -3.60450100 | 1.00208900  | 0.91926500  |
| Mg | 0.71320400  | 0.22737000  | -0.00004800 |
| Br | -0.62516600 | -1.94180100 | 0.00026900  |
| Br | 3.06868700  | 0.05059800  | -0.00007900 |
| Br | -0.97779300 | 1.96051500  | -0.00023600 |

**TS2<sub>HMgBr3</sub>**

|   |            |             |             |
|---|------------|-------------|-------------|
| H | 4.88441000 | -0.23568500 | 0.89832600  |
| C | 4.31575300 | -0.47643100 | 0.00005200  |
| H | 4.14682000 | -1.56063200 | -0.00000200 |

|    |             |             |             |
|----|-------------|-------------|-------------|
| H  | 4.88444700  | -0.23560100 | -0.89817500 |
| C  | 2.97128600  | 0.14583000  | 0.00005300  |
| H  | 2.41447000  | 0.25187100  | -0.91531700 |
| H  | 2.41443400  | 0.25179800  | 0.91540900  |
| Mg | -0.73054100 | -0.02140700 | -0.00001200 |
| H  | 2.61664200  | 2.02253900  | 0.00010200  |
| H  | 3.38068000  | 1.73763800  | 0.00014000  |
| Br | -3.07426700 | -0.35652700 | -0.00004800 |
| Br | 0.97220500  | -1.85443700 | -0.00006800 |
| Br | 0.39641600  | 2.21120900  | 0.00008800  |

**TS3<sub>HMgBr3</sub>**

|    |             |             |             |
|----|-------------|-------------|-------------|
| H  | -2.41564500 | -1.05305500 | 0.54359600  |
| C  | -3.39978000 | -0.58970600 | 0.97877500  |
| H  | -3.99955300 | -1.47832900 | 1.17522400  |
| H  | -3.04727900 | -0.07087600 | 1.86889400  |
| C  | -3.91877200 | 0.26203100  | -0.02658700 |
| H  | -3.74370000 | 1.33057100  | 0.00050300  |
| H  | -4.66269300 | -0.09015400 | -0.73464700 |
| Mg | 0.75244400  | 0.09108300  | -0.04032800 |
| H  | -2.24983000 | 0.56927400  | -1.23322800 |
| H  | -2.81899700 | 0.08511000  | -1.47218400 |
| Br | 3.11306400  | -0.01681400 | 0.12851300  |
| Br | -0.77274100 | 2.01617600  | -0.08974300 |
| Br | -0.68833200 | -1.95420500 | -0.19240800 |

**D-HMg<sub>2</sub>F<sub>5</sub>**

|    |             |             |             |
|----|-------------|-------------|-------------|
| H  | 3.01765800  | -0.00002800 | 0.40360000  |
| Mg | -1.86682500 | -0.00000100 | 0.00061700  |
| Mg | 1.04120400  | 0.00001300  | -0.17831600 |
| F  | -3.64417200 | -0.00000900 | 0.11921800  |
| F  | 2.51620800  | -0.00008600 | 1.27523100  |
| F  | -0.41279500 | 1.25034500  | -0.09711900 |
| F  | -0.41279200 | -1.25033100 | -0.09726600 |
| F  | 2.71908300  | 0.00006700  | -1.00797700 |

**D-HMg<sub>2</sub>Cl<sub>5</sub>**

|    |             |             |             |
|----|-------------|-------------|-------------|
| H  | -3.32737200 | 0.02328000  | -1.08904300 |
| Cl | -2.34235200 | 0.04185200  | -1.95780600 |
| Cl | -3.23449200 | -0.02783900 | 1.30294500  |
| Mg | -1.18915100 | -0.00823600 | 0.38571600  |
| Mg | 2.06795500  | -0.00220900 | 0.10189700  |
| Cl | 4.24767400  | 0.00328200  | -0.15258400 |
| Cl | 0.45228800  | 1.71029600  | 0.30024600  |
| Cl | 0.45227700  | -1.72158600 | 0.22706100  |

**D-HMg<sub>2</sub>Br<sub>5</sub>**

|    |             |             |             |
|----|-------------|-------------|-------------|
| H  | -3.43484200 | -0.00000100 | 0.89724900  |
| Mg | -1.17620400 | 0.00000000  | -0.37180200 |
| Mg | 2.19310200  | 0.00000000  | -0.12288400 |
| Br | 4.52516800  | 0.00000000  | 0.11288900  |
| Br | 0.52186100  | 1.87616200  | -0.26177000 |
| Br | 0.52186100  | -1.87616200 | -0.26177400 |
| Br | -2.51096500 | -0.00000200 | 2.04124200  |
| Br | -3.30843700 | 0.00000100  | -1.48661700 |

**T-HMg<sub>2</sub>F<sub>5</sub>**

|   |            |            |             |
|---|------------|------------|-------------|
| H | 1.03182500 | 1.53083200 | -0.00001700 |
|---|------------|------------|-------------|

|    |             |             |             |
|----|-------------|-------------|-------------|
| Mg | -1.18726300 | -0.00671500 | -0.00000400 |
| Mg | 1.46138600  | -0.81713200 | 0.00000900  |
| F  | 0.08823100  | -0.86160400 | 1.27522600  |
| F  | -2.97130800 | 0.14109200  | 0.00000100  |
| F  | 0.08823000  | -0.86163500 | -1.27521500 |
| F  | 0.04046500  | 1.67079900  | -0.00000700 |
| F  | 2.27423600  | 0.83972000  | -0.00000900 |

**T-HMg<sub>2</sub>Cl<sub>5</sub>**

|    |             |             |             |
|----|-------------|-------------|-------------|
| Cl | -3.69461600 | 0.47232100  | -0.00046500 |
| Cl | 0.36485900  | 1.77528100  | 0.03104800  |
| H  | 3.23012600  | 1.47677000  | 0.00977100  |
| Mg | -1.52743800 | 0.06005000  | -0.00084100 |
| Mg | 1.22343700  | -0.41582000 | 0.00067700  |
| Cl | 3.64992000  | 0.24551900  | -0.00102000 |
| Cl | -0.14281500 | -1.13819000 | -1.73419500 |
| Cl | -0.15276700 | -1.19066800 | 1.70417500  |

**T-HMg<sub>2</sub>Br<sub>5</sub>**

|    |             |             |             |
|----|-------------|-------------|-------------|
| H  | 3.52583600  | 1.54014900  | -0.00097700 |
| Mg | -1.59184300 | 0.03641900  | 0.00001000  |
| Mg | 1.25096600  | -0.33128800 | -0.00084700 |
| Br | -3.92353900 | 0.37152900  | 0.00120200  |
| Br | 0.29937900  | 1.98285600  | 0.00461000  |
| Br | -0.12101400 | -1.22732900 | 1.86047300  |
| Br | -0.12114700 | -1.21801800 | -1.86669300 |
| Br | 3.88245500  | 0.14805500  | 0.00072200  |

**IM1<sub>D</sub>-HMg<sub>2</sub>F<sub>5</sub>-1**

|    |             |             |             |
|----|-------------|-------------|-------------|
| H  | -2.24177600 | -0.97121700 | 0.29050600  |
| C  | -4.05499600 | -0.91591700 | -0.43320500 |
| H  | -4.48971900 | -1.89918200 | -0.28443600 |
| H  | -3.74278700 | -0.66320000 | -1.44186100 |
| H  | -3.51162900 | 0.95135700  | 0.39052100  |
| H  | -4.29091600 | -0.26784100 | 1.56422000  |
| Mg | -0.17529800 | 0.54254300  | -0.10175800 |
| Mg | 2.65748900  | -0.13102200 | 0.01165100  |
| C  | -3.95006300 | -0.02773400 | 0.56162200  |
| F  | -1.27855800 | -1.11244500 | 0.35426200  |
| F  | -1.57172600 | 1.66118300  | -0.37146200 |
| F  | 1.28985300  | 0.53476100  | 1.16727100  |
| F  | 1.23561300  | -0.10408200 | -1.26373300 |
| F  | 4.38269500  | -0.58233400 | 0.09053200  |

**IM2<sub>D</sub>-HMg<sub>2</sub>F<sub>5</sub>-1**

|    |             |             |             |
|----|-------------|-------------|-------------|
| H  | 3.13737100  | 0.02053400  | 1.28165100  |
| C  | 3.46741500  | -0.84165800 | 0.70054800  |
| H  | 3.18133400  | -1.77160300 | 1.19547600  |
| H  | 4.55961800  | -0.80966800 | 0.63723200  |
| H  | 3.10125200  | 0.18749200  | -1.17461600 |
| H  | 3.18629400  | -1.60722200 | -1.33076800 |
| Mg | 0.30817400  | 0.69259500  | 0.02645500  |
| Mg | -2.47744500 | -0.15980600 | 0.05452900  |
| C  | 2.91584500  | -0.76907200 | -0.69221600 |
| F  | 1.67217400  | 1.84640200  | 0.29286100  |
| F  | 1.44331500  | -0.86285800 | -0.62259700 |
| F  | -0.97269500 | -0.13092000 | 1.22913700  |
| F  | -1.24399000 | 0.68257000  | -1.13551100 |

|   |             |             |            |
|---|-------------|-------------|------------|
| F | -4.16927000 | -0.72948500 | 0.05491400 |
|---|-------------|-------------|------------|

**IM3<sub>D</sub>-HMg<sub>2</sub>F<sub>5</sub>-1**

|    |             |             |             |
|----|-------------|-------------|-------------|
| H  | -2.20141600 | -0.81812300 | -0.65173400 |
| C  | -3.95712300 | -1.21638100 | 0.11863700  |
| H  | -4.37448600 | -2.04249900 | -0.44813600 |
| H  | -3.57605200 | -1.44354500 | 1.10959800  |
| C  | -3.95186400 | 0.03603500  | -0.35113800 |
| H  | -3.52780200 | 0.84986600  | 0.23031100  |
| H  | -4.36051400 | 0.26774600  | -1.33009400 |
| H  | -1.35620400 | 2.34746700  | -1.27739000 |
| H  | -0.87023500 | 2.24072800  | -1.83471900 |
| Mg | -0.15624600 | 0.48597700  | 0.27098200  |
| Mg | 2.67309300  | -0.17458000 | -0.01170300 |
| F  | 4.39420700  | -0.60160800 | -0.21904700 |
| F  | 1.36855800  | 0.94940000  | -0.83765500 |
| F  | 1.19964100  | -0.62554800 | 1.11091300  |
| F  | -1.24261500 | -0.85328800 | -0.82286300 |
| F  | -1.55107100 | 1.34700800  | 1.04485300  |

**TS1<sub>D</sub>-HMg<sub>2</sub>F<sub>5</sub>-1**

|    |             |             |             |
|----|-------------|-------------|-------------|
| H  | 2.63561500  | 1.02816100  | -0.00030300 |
| C  | 3.83109700  | 0.55644700  | -0.00038100 |
| H  | 4.20426900  | 0.99786100  | 0.92151900  |
| H  | 4.20409300  | 0.99772600  | -0.92241700 |
| H  | 3.62746500  | -1.39321800 | -0.91557900 |
| H  | 3.62764300  | -1.39308500 | 0.91514100  |
| Mg | 0.26449000  | 0.01709800  | -0.00001400 |
| Mg | -2.64710800 | -0.02235800 | 0.00022300  |
| C  | 3.61976800  | -0.81782700 | -0.00026000 |
| F  | 1.44530100  | 1.50750600  | -0.00022500 |
| F  | 1.59662000  | -1.29061200 | -0.00002700 |
| F  | -1.21597900 | -0.00548700 | 1.26052500  |
| F  | -1.21618200 | -0.00567700 | -1.26031100 |
| F  | -4.43341000 | -0.05084500 | 0.00036900  |

**TS2<sub>D</sub>-HMg<sub>2</sub>F<sub>5</sub>-1**

|    |             |             |             |
|----|-------------|-------------|-------------|
| H  | 5.12885200  | -0.51729700 | 0.90270700  |
| C  | 4.53853700  | -0.66949400 | -0.00001200 |
| H  | 4.19853600  | -1.71921000 | 0.00004000  |
| H  | 5.12883700  | -0.51738200 | -0.90275600 |
| C  | 3.26206700  | 0.05594600  | -0.00003600 |
| H  | 2.72833200  | 0.20614900  | -0.91857300 |
| H  | 2.72834700  | 0.20623600  | 0.91849600  |
| H  | 2.97869700  | 1.87183900  | -0.00011800 |
| H  | 3.76763100  | 1.72317900  | -0.00012000 |
| Mg | 0.12938900  | 0.14566900  | -0.00001100 |
| Mg | -2.76822600 | -0.10464200 | 0.00003600  |
| F  | -4.55009200 | -0.26330200 | 0.00006600  |
| F  | -1.35415100 | 0.01842400  | 1.26620600  |
| F  | -1.35418200 | 0.01830100  | -1.26617900 |
| F  | 1.20270100  | 1.69105700  | -0.00010100 |
| F  | 1.41163500  | -1.24943000 | 0.00004200  |

**TS3<sub>D</sub>-HMg<sub>2</sub>F<sub>5</sub>-1**

|   |             |             |             |
|---|-------------|-------------|-------------|
| H | -2.59233800 | -1.04832000 | -0.25747900 |
| C | -3.77675200 | -1.10563100 | 0.15258000  |
| H | -4.20833100 | -1.81591900 | -0.54997700 |

|                                  |             |             |             |                                  |             |             |             |
|----------------------------------|-------------|-------------|-------------|----------------------------------|-------------|-------------|-------------|
| H                                | -3.58015500 | -1.49477400 | 1.15115700  | Mg                               | 0.51994800  | 0.52280900  | -0.14603000 |
| C                                | -4.30492000 | 0.19049300  | 0.11569900  | Mg                               | -2.71939600 | -0.01345300 | -0.04272700 |
| H                                | -4.27430000 | 0.83382600  | 0.98658100  | Cl                               | -4.87719900 | -0.42062700 | 0.05937600  |
| H                                | -4.98531300 | 0.50176100  | -0.66961300 | Cl                               | -1.09341700 | -0.30434500 | -1.71925000 |
| H                                | -2.61100900 | 1.51183100  | -0.32821600 | Cl                               | -1.16661800 | 0.80990800  | 1.52841100  |
| H                                | -3.28750700 | 1.33091600  | -0.74192000 |                                  |             |             |             |
| Mg                               | -0.11156200 | 0.27176600  | -0.04575400 | <b>TS1<sub>D-HMg2Cl5-1</sub></b> |             |             |             |
| Mg                               | 2.77304200  | -0.10509600 | 0.03453900  | Cl                               | -2.16104500 | -1.82322700 | 0.00023200  |
| F                                | 4.54287700  | -0.35408500 | 0.07997000  | Cl                               | -1.82101200 | 1.84344300  | -0.00000600 |
| F                                | 1.45145900  | 0.53439100  | -1.17867800 | H                                | -3.34815900 | 1.12497000  | -0.00039600 |
| F                                | 1.27091900  | -0.35997900 | 1.17708800  | C                                | -4.62382200 | 0.86584600  | -0.00074600 |
| F                                | -1.32935300 | -1.07069500 | -0.61870500 | H                                | -4.87832400 | 1.38028800  | -0.92454200 |
| F                                | -1.25910000 | 1.65830800  | 0.42192000  | H                                | -4.87885500 | 1.38047700  | 0.92279900  |
|                                  |             |             |             | C                                | -4.63495300 | -0.51130000 | -0.00060600 |
| <b>IM1<sub>D-HMg2Cl5-1</sub></b> |             |             |             | H                                | -4.65272200 | -1.08234300 | 0.91824100  |
| Cl                               | -2.20980700 | 2.07111100  | 0.03054300  | H                                | -4.65220200 | -1.08253500 | -0.91934400 |
| Cl                               | -1.64446500 | -1.64429800 | -0.16762900 | Mg                               | -0.58243400 | -0.17816500 | 0.00015300  |
| H                                | -2.92424000 | -1.26010300 | -0.06154000 | Mg                               | 2.69149700  | -0.01860500 | 0.00008800  |
| C                                | -4.99077500 | -1.50313700 | 0.07983700  | Cl                               | 4.88832100  | 0.13047800  | 0.00003400  |
| H                                | -5.03508700 | -2.08276700 | 0.99630900  | Cl                               | 1.09549700  | -0.11922300 | -1.72348500 |
| H                                | -5.15199800 | -2.04458600 | -0.84683100 | Cl                               | 1.09554300  | -0.11893500 | 1.72372300  |
| C                                | -4.78470200 | -0.18367800 | 0.09420900  |                                  |             |             |             |
| H                                | -4.75280000 | 0.40393300  | -0.81603400 | <b>TS2<sub>D-HMg2Cl5-1</sub></b> |             |             |             |
| H                                | -4.63660600 | 0.36590100  | 1.01649100  | H                                | 5.98721200  | -0.59737900 | 0.90033900  |
| Mg                               | -0.51223400 | 0.63521000  | -0.02076200 | C                                | 5.39631300  | -0.76409600 | -0.00008400 |
| Mg                               | 2.69964800  | -0.04571700 | 0.02581900  | H                                | 5.09068000  | -1.82054400 | -0.00016600 |
| Cl                               | 4.83906800  | -0.54923000 | 0.04906800  | H                                | 5.98719200  | -0.59723300 | -0.90049300 |
| Cl                               | 1.08385800  | 0.21615800  | 1.71915000  | C                                | 4.12084400  | -0.01692600 | -0.00000900 |
| Cl                               | 1.16102900  | 0.35711700  | -1.71309500 | H                                | 3.57098200  | 0.12462300  | -0.91556000 |
|                                  |             |             |             | H                                | 3.57100200  | 0.12447400  | 0.91557600  |
| <b>IM2<sub>D-HMg2Cl5-1</sub></b> |             |             |             | H                                | 3.98085000  | 1.81199700  | 0.00015000  |
| Cl                               | -1.73536100 | -0.96273200 | 1.41472800  | H                                | 4.72568400  | 1.52618000  | 0.00010700  |
| Cl                               | -2.48319400 | 1.88602100  | -0.86086600 | Cl                               | 1.76819100  | 2.09551700  | 0.00021700  |
| H                                | -2.77219400 | -1.25211000 | -1.41941300 | Cl                               | 1.95698500  | -1.72128500 | -0.00012000 |
| C                                | -3.31015400 | -1.86924200 | -0.69860400 | Mg                               | 0.49986800  | 0.12704400  | 0.00003100  |
| H                                | -2.82553100 | -2.84320800 | -0.61961400 | Mg                               | -2.79678600 | -0.07446700 | -0.00002700 |
| H                                | -4.32430800 | -2.01731000 | -1.08341600 | Cl                               | -4.99936400 | -0.21400900 | -0.00006500 |
| C                                | -3.41966200 | -1.18575700 | 0.64096600  | Cl                               | -1.19975400 | 0.02248600  | -1.72636100 |
| H                                | -3.81128700 | -0.17443800 | 0.57526900  | Cl                               | -1.19979500 | 0.02217900  | 1.72636300  |
| H                                | -3.95270600 | -1.76823400 | 1.38792800  |                                  |             |             |             |
| Mg                               | -0.71198500 | 0.76808500  | -0.10544900 | <b>TS3<sub>D-HMg2Cl5-1</sub></b> |             |             |             |
| Mg                               | 2.46306400  | -0.04306700 | -0.11676400 | Cl                               | 1.91374900  | 1.84492700  | -0.64938800 |
| Cl                               | 4.57476400  | -0.64829800 | -0.03790100 | Cl                               | 1.86165900  | -1.51585800 | 1.01606900  |
| Cl                               | 0.66472200  | -0.60259000 | -1.52533900 | H                                | 3.53059000  | -1.17026800 | 0.05785600  |
| Cl                               | 1.15859800  | 1.36789800  | 1.25476900  | C                                | 4.53875400  | -1.05493100 | -0.53479500 |
|                                  |             |             |             | H                                | 5.11877900  | -1.90903000 | -0.18673900 |
| <b>IM3<sub>D-HMg2Cl5-1</sub></b> |             |             |             | H                                | 4.19299400  | -1.12668700 | -1.56637600 |
| Cl                               | 2.25970700  | 1.82400700  | -0.65031700 | C                                | 5.07316200  | 0.20928600  | -0.19203100 |
| Cl                               | 1.58726500  | -1.65514600 | 0.60833000  | H                                | 4.86738000  | 1.08571400  | -0.79580700 |
| H                                | 2.85730300  | -1.28736600 | 0.36076000  | H                                | 5.85324500  | 0.31220000  | 0.55602700  |
| C                                | 4.63643600  | -0.93125900 | -0.65955800 | H                                | 3.48855900  | 1.19958900  | 0.78439300  |
| H                                | 4.96877800  | -1.91752700 | -0.96720200 | H                                | 4.07543600  | 0.89863200  | 1.20171700  |
| H                                | 4.20629900  | -0.28737700 | -1.41921000 | Mg                               | 0.50409700  | 0.17506500  | 0.09740500  |
| C                                | 4.76660800  | -0.50821800 | 0.60084300  | Mg                               | -2.79138900 | -0.04632400 | -0.06166400 |
| H                                | 4.44510700  | 0.48675900  | 0.88832300  | Cl                               | -4.99082500 | -0.19912500 | -0.16580900 |
| H                                | 5.21075500  | -1.13276200 | 1.36926500  | Cl                               | -1.07399200 | -0.68258400 | -1.53932800 |
| H                                | 2.24525300  | 1.39709900  | 2.40040300  | Cl                               | -1.31947100 | 0.80198300  | 1.56674900  |
| H                                | 1.97606800  | 0.95123000  | 2.93369900  |                                  |             |             |             |

| <b>IM1<sub>D-HMg2Br5-1</sub></b> |             |             |             |
|----------------------------------|-------------|-------------|-------------|
| H                                | -3.13600900 | -1.60551000 | -0.40413500 |
| C                                | -4.92463800 | -2.27201900 | 0.49002800  |
| H                                | -4.51823000 | -3.03104600 | 1.15054300  |
| H                                | -5.40438600 | -2.62304100 | -0.41792300 |
| H                                | -5.28728500 | -0.21093200 | 0.14937700  |
| H                                | -4.40889900 | -0.61736300 | 1.71091100  |
| Mg                               | -0.87899800 | 0.61389800  | -0.01055500 |
| Mg                               | 2.46425100  | 0.03573200  | 0.14707200  |
| Br                               | 1.02450800  | 1.02607500  | -1.65938200 |
| Br                               | 4.76417000  | -0.43196700 | 0.19982300  |
| Br                               | -1.86695900 | -1.63347300 | -1.16383300 |
| Br                               | 0.63372500  | -0.36051400 | 1.81152800  |
| Br                               | -2.76933500 | 1.96462400  | 0.48168100  |
| C                                | -4.87235900 | -0.97360600 | 0.79821600  |

| <b>IM2<sub>D-HMg2Br5-1</sub></b> |             |             |             |
|----------------------------------|-------------|-------------|-------------|
| H                                | 2.93666400  | -1.51666300 | 1.55611800  |
| C                                | 3.50413000  | -2.19353400 | 0.91655600  |
| H                                | 3.00530800  | -3.16268900 | 0.88068900  |
| H                                | 4.48953900  | -2.32978500 | 1.37519200  |
| H                                | 4.11953900  | -0.60418900 | -0.44473700 |
| H                                | 4.27076500  | -2.25705700 | -1.13241000 |
| Mg                               | 0.97626800  | 0.60053500  | 0.08064300  |
| Mg                               | -2.37596900 | 0.06761900  | 0.13935000  |
| Br                               | -0.91751800 | 1.36253600  | -1.44694300 |
| Br                               | -4.68240000 | -0.36941800 | 0.09474000  |
| Br                               | 2.90779900  | 1.75262800  | 0.86138600  |
| Br                               | -0.55998300 | -0.65922300 | 1.70344700  |
| Br                               | 1.95684400  | -1.38123500 | -1.43049800 |
| C                                | 3.71397900  | -1.61188100 | -0.45812600 |

| <b>IM3<sub>D-HMg2Br5-1</sub></b> |             |             |             |
|----------------------------------|-------------|-------------|-------------|
| H                                | -3.31730600 | 1.51571600  | -0.05132900 |
| C                                | -5.15950100 | 0.82048000  | -0.80133500 |
| H                                | -5.54019300 | 1.65535800  | -1.38072100 |
| H                                | -4.74481400 | -0.01996200 | -1.34751600 |
| C                                | -5.21209200 | 0.81018300  | 0.53344100  |
| H                                | -4.84176800 | -0.03838500 | 1.09788900  |
| H                                | -5.63797300 | 1.63588800  | 1.09417700  |
| H                                | -2.69122100 | -0.41425800 | 2.77493000  |
| H                                | -2.50661600 | 0.19691800  | 3.15952100  |
| Mg                               | -0.83972700 | -0.45934100 | -0.01162900 |
| Mg                               | 2.54042500  | -0.08075900 | -0.01035300 |
| Br                               | 4.86935000  | 0.21782600  | -0.00568000 |
| Br                               | 0.88416800  | -0.23048700 | -1.88736600 |
| Br                               | 0.88289700  | -0.26357400 | 1.86384500  |
| Br                               | -1.91879800 | 2.01695800  | -0.00297800 |
| Br                               | -2.68615700 | -1.96455300 | -0.06713000 |

| <b>TS1<sub>D-HMg2Br5-1</sub></b> |             |             |             |
|----------------------------------|-------------|-------------|-------------|
| H                                | -3.73104600 | 1.27330500  | 0.00011400  |
| C                                | -5.07680300 | 1.07298300  | 0.00033500  |
| H                                | -5.28235000 | 1.60786800  | -0.92322100 |
| H                                | -5.28205300 | 1.60784900  | 0.92396900  |
| H                                | -5.16072800 | -0.86582700 | 0.91953500  |
| H                                | -5.16101800 | -0.86580600 | -0.91887800 |
| Mg                               | -0.87509500 | -0.22104700 | -0.00007400 |

|    |             |             |             |
|----|-------------|-------------|-------------|
| Mg | 2.51648500  | -0.04984900 | 0.00003300  |
| Br | 0.86527200  | -0.14432200 | 1.88105200  |
| Br | 4.86247900  | 0.10774400  | 0.00010400  |
| Br | -2.12613400 | 2.00675900  | -0.00014100 |
| Br | 0.86538900  | -0.14435300 | -1.88108700 |
| Br | -2.57506200 | -1.94505900 | -0.00007100 |
| C  | -5.13944500 | -0.29523500 | 0.00033100  |

| <b>TS2<sub>D-HMg2Br5-1</sub></b> |             |             |             |
|----------------------------------|-------------|-------------|-------------|
| H                                | 6.35564500  | -0.70587500 | 0.89840400  |
| C                                | 5.76581400  | -0.88879200 | 0.00012000  |
| H                                | 5.48954300  | -1.95050000 | 0.00004000  |
| H                                | 6.35574300  | -0.70576500 | -0.89807800 |
| C                                | 4.49124400  | -0.13334300 | 0.00009600  |
| H                                | 3.95023500  | 0.03245500  | -0.91604900 |
| H                                | 3.95014400  | 0.03235600  | 0.91620400  |
| H                                | 4.34024500  | 1.77966400  | 0.00017600  |
| H                                | 5.06629200  | 1.40946000  | 0.00021400  |
| Mg                               | 0.85196500  | 0.09074600  | -0.00003300 |
| Mg                               | -2.53639100 | -0.05119900 | 0.00001300  |
| Br                               | -4.88725500 | -0.15777900 | 0.00004500  |
| Br                               | -0.89253000 | 0.01884300  | 1.88563300  |
| Br                               | -0.89258700 | 0.01898600  | -1.88565000 |
| Br                               | 2.15817300  | 2.22277400  | 0.00003100  |
| Br                               | 2.31885400  | -1.93806800 | -0.00011600 |

| <b>TS3<sub>D-HMg2Br5-1</sub></b> |             |             |             |
|----------------------------------|-------------|-------------|-------------|
| H                                | 4.00443300  | -1.30579700 | -0.34494300 |
| C                                | 5.01079000  | -1.07670400 | -0.91786400 |
| H                                | 5.56623400  | -2.00557800 | -0.79251500 |
| H                                | 4.64842600  | -0.89897900 | -1.93033100 |
| C                                | 5.58588200  | 0.05467800  | -0.29518500 |
| H                                | 5.39770400  | 1.05510300  | -0.66665600 |
| H                                | 6.36408800  | -0.04358200 | 0.45506200  |
| H                                | 3.97864200  | 0.86556300  | 0.94028900  |
| H                                | 4.56506700  | 0.42448900  | 1.20772900  |
| Mg                               | 0.84747700  | 0.15135500  | 0.10154300  |
| Mg                               | -2.58222800 | -0.01296700 | -0.05584700 |
| Br                               | -4.93572700 | -0.13534600 | -0.16311100 |
| Br                               | -0.82923200 | -0.27812000 | -1.83369200 |
| Br                               | -1.02817200 | 0.41133200  | 1.86950300  |
| Br                               | 2.24289700  | -1.90268300 | 0.58469000  |
| Br                               | 2.34201700  | 2.08711100  | -0.23278100 |

| <b>IM1<sub>D-HMg2F5-2</sub></b> |             |             |             |
|---------------------------------|-------------|-------------|-------------|
| H                               | -2.24161000 | -0.97222800 | -0.28742700 |
| C                               | -4.05618800 | -0.91582000 | 0.43262100  |
| H                               | -3.74589700 | -0.66257900 | 1.44170900  |
| H                               | -4.49090600 | -1.89903000 | 0.28362300  |
| C                               | -3.94910800 | -0.02838900 | -0.56261800 |
| H                               | -4.28802400 | -0.26906200 | -1.56570800 |
| H                               | -3.51064800 | 0.95065400  | -0.39142100 |
| Mg                              | -0.17524600 | 0.54298100  | 0.10176600  |
| Mg                              | 2.65742300  | -0.13112900 | -0.01189500 |
| F                               | 4.38249900  | -0.58293900 | -0.09087500 |
| F                               | 1.23628600  | -0.10135400 | 1.26426200  |
| F                               | -1.27832900 | -1.11320700 | -0.35041800 |
| F                               | 1.28922700  | 0.53258300  | -1.16806000 |

F -1.57160000 1.66216900 0.36961800

**IM2<sub>D-HMg2F5-2</sub>**

H 1.75394100 1.73575000 -0.06928300  
C 2.76292700 1.45984300 0.24450000  
H 2.81874500 1.39594400 1.33270000  
H 3.44844000 2.24824100 -0.08337700  
C 3.20122500 0.18315900 -0.40372100  
H 3.09375700 0.17033800 -1.48585400  
H 4.17630000 -0.18201400 -0.09257900  
Mg 0.32555300 -0.81946400 0.13824500  
Mg -1.97354200 0.22932000 -0.04174000  
F -3.59185300 0.99897200 -0.18015500  
F -0.72409200 -0.07156400 1.52808200  
F -0.18769200 0.71398900 -0.88361600  
F -1.26582300 -1.62305700 -0.48656300  
F 2.29165600 -0.92328900 0.04399100

**IM3<sub>D-HMg2F5-2</sub>**

H -2.20150100 -0.81892900 -0.65053100  
C -3.95814300 -1.21556500 0.11856800  
H -4.37553000 -2.04170100 -0.44815000  
H -3.57817000 -1.44245800 1.11001200  
C -3.95159400 0.03658900 -0.35188300  
H -3.52752100 0.85046000 0.22949300  
H -4.35914300 0.26804500 -1.33135700  
H -0.87223600 2.23846900 -1.83662400  
H -1.35754100 2.34566300 -1.27880500  
Mg 2.67326900 -0.17434500 -0.01191200  
Mg -0.15614500 0.48564500 0.27124100  
F -1.55087200 1.34745200 1.04441900  
F 1.20036400 -0.62469800 1.11169300  
F -1.24261900 -0.85475500 -0.82108200  
F 1.36809000 0.94846800 -0.83842400  
F 4.39443300 -0.60105500 -0.21950500

**TS1<sub>D-HMg2F5-2</sub>**

H -1.36146800 1.29748600 0.00073800  
C -2.53947500 1.77224700 0.00007100  
H -2.49880400 2.34490700 -0.92448100  
H -2.49965300 2.34493400 0.92464800  
C -3.29916600 0.61458600 -0.00024500  
H -3.65488900 0.16344200 0.91611800  
H -3.65419800 0.16347700 -0.91689300  
Mg -0.29683100 -1.17248500 -0.00003300  
Mg 1.90934200 0.24590200 -0.00009700  
F 3.29684700 1.38466200 0.00000300  
F 1.11038900 -1.01903800 -1.28855200  
F -0.12320200 0.86374500 0.00150500  
F 1.11176800 -1.02111100 1.28719300  
F -2.13460900 -1.26561800 0.00012700

**TS2<sub>D-HMg2F5-2</sub>**

H 4.18280600 -1.57117800 -0.64023100  
C 3.58312200 -1.22713300 0.20124900  
H 3.99734000 -0.25631100 0.52622200  
H 3.63509400 -1.90679200 1.05048400  
C 2.21721900 -0.82841400 -0.15999700

H 1.46836700 -0.71412500 0.61762600  
H 2.03308700 -0.34863300 -1.10639100  
H 1.02130800 -1.90963600 -0.85262400  
H 1.62177200 -2.36205700 -0.62768700  
Mg 0.13206300 1.28308600 -0.01710900  
Mg -1.86386900 -0.36845100 0.04666800  
F -1.73561600 1.60647500 -0.17590100  
F -0.37015900 -0.03719800 1.33814700  
F -0.26302700 -0.32292500 -1.17581100  
F -3.14900300 -1.62867700 0.07167400  
F 1.96445400 1.54081400 -0.01029000

**TS3<sub>D-HMg2F5-2</sub>**

H 1.37636700 -1.27169700 -0.85160500  
C 2.49235500 -1.53879200 -0.74186700  
H 2.68009200 -2.58657700 -0.95464200  
H 2.83195000 -0.83960400 -1.52258700  
C 2.89665100 -1.04578300 0.51792300  
H 2.84185700 0.03575900 0.68222200  
H 3.37146800 -1.67367200 1.26610600  
H 0.92106200 -0.93054400 1.73957600  
H 1.49291600 -1.43856200 1.83762400  
Mg -1.81366500 -0.31896500 0.01032100  
Mg 0.24439200 1.28588900 -0.06385800  
F 2.03926900 1.62446800 0.00974000  
F -1.58189200 1.56622000 -0.54453200  
F -0.04601600 -0.48953200 -0.97505400  
F -0.50641000 0.24339800 1.42009000  
F -3.12922600 -1.54352500 0.06635900

**IM1<sub>D-HMg2Cl5-2</sub>**

Cl -2.29162000 1.93477700 -0.01680200  
Cl -1.62600400 -1.75137300 0.02027400  
H -2.90041700 -1.32002700 0.01256100  
C -4.75524200 -0.64893500 0.66742100  
H -4.37414800 0.20654200 1.21474600  
H -5.15198500 -1.47791700 1.24473400  
C -4.75150200 -0.66245700 -0.66852300  
H -5.14502500 -1.50295700 -1.23117500  
H -4.36735300 0.18181700 -1.23094400  
Mg -0.54569800 0.55069300 -0.00534000  
Mg 2.69017800 -0.00139400 0.00403400  
Cl 4.84851900 -0.41661800 -0.00196500  
Cl 1.09979900 0.28808900 1.71772500  
Cl 1.10140200 0.25037800 -1.71850500

**IM2<sub>D-HMg2Cl5-2</sub>**

Cl 3.11323300 0.87623700 0.02704700  
Cl -0.30122600 -0.44435600 1.84640700  
H 2.02470300 -1.90318300 0.64887100  
C 3.09100200 -1.90153200 0.42007400  
H 3.34071600 -2.88130200 -0.00080000  
H 3.66046000 -1.76810600 1.34041900  
C 3.44773100 -0.86965200 -0.61520300  
H 4.50759800 -0.81772000 -0.84845900  
H 2.84785900 -0.92789000 -1.51902800  
Mg 0.68080700 0.80234100 0.11223000  
Mg -1.95273500 -0.15572900 -0.01675800



|    |             |             |             |
|----|-------------|-------------|-------------|
| Cl | -4.01814400 | -0.93090600 | -0.14662400 |
| Cl | -0.02454300 | -0.71500000 | -1.55281600 |
| Cl | -1.14288600 | 2.22378600  | -0.15024300 |

**IM3<sub>D</sub>-HMg2Cl5-2**

|    |             |             |             |
|----|-------------|-------------|-------------|
| H  | 2.85766400  | -1.29193800 | 0.34274400  |
| C  | 4.64158300  | -0.91952700 | -0.66302300 |
| H  | 4.97681000  | -1.90112100 | -0.98226500 |
| H  | 4.21451200  | -0.26595500 | -1.41609700 |
| C  | 4.76466700  | -0.51346600 | 0.60365500  |
| H  | 4.44038800  | 0.47711000  | 0.90293000  |
| H  | 5.20559900  | -1.14782000 | 1.36586900  |
| H  | 1.97695100  | 0.90678700  | 2.94287900  |
| H  | 2.24555800  | 1.36109900  | 2.41646700  |
| Mg | -2.71977600 | -0.01224800 | -0.04121200 |
| Mg | 0.51970300  | 0.52388400  | -0.14254500 |
| Cl | -1.09664300 | -0.28059200 | -1.72433800 |
| Cl | -1.16411000 | 0.78890300  | 1.53840400  |
| Cl | 1.58705300  | -1.66529600 | 0.57874600  |
| Cl | 2.25977300  | 1.83147000  | -0.62892500 |
| Cl | -4.87749100 | -0.42035800 | 0.05898100  |

**TS1<sub>D</sub>-HMg2Cl5-2**

|    |             |             |             |
|----|-------------|-------------|-------------|
| Cl | 3.17531600  | -0.94566500 | -0.07970000 |
| Cl | 0.08589200  | 0.58086900  | -1.59825100 |
| H  | 1.11887700  | 1.67524300  | -0.77801300 |
| C  | 1.69743400  | 2.68947200  | -0.21241000 |
| H  | 0.87112400  | 2.97464500  | 0.43492500  |
| H  | 1.86933800  | 3.30067100  | -1.09513600 |
| C  | 2.75830300  | 2.01892100  | 0.34561100  |
| H  | 3.69418300  | 1.88310300  | -0.18251400 |
| H  | 2.68447600  | 1.56435800  | 1.32608600  |
| Mg | 0.94445700  | -1.14025400 | 0.06283200  |
| Mg | -1.79830700 | -0.06334000 | 0.13586900  |
| Cl | -3.73185200 | 0.98943800  | -0.03095300 |
| Cl | -0.04653500 | 0.24139300  | 1.78433100  |
| Cl | -1.05495200 | -2.34869800 | -0.24536700 |

**TS2<sub>D</sub>-HMg2Cl5-2**

|    |             |             |             |
|----|-------------|-------------|-------------|
| H  | 4.43015000  | -2.59395400 | -0.57617900 |
| C  | 3.87625400  | -2.11728000 | 0.23165700  |
| H  | 4.48152800  | -1.27234800 | 0.59418000  |
| H  | 3.72691300  | -2.79163000 | 1.07427100  |
| C  | 2.63001700  | -1.46542200 | -0.21468800 |
| H  | 1.88561900  | -1.18233200 | 0.52086900  |
| H  | 2.58613500  | -0.97732400 | -1.17596500 |
| H  | 1.27159300  | -2.36563700 | -0.92116800 |
| H  | 1.83522900  | -2.85427000 | -0.65929400 |
| Cl | 2.90997700  | 1.34049100  | 0.01583500  |
| Cl | -0.11411200 | -0.30227800 | 1.73856600  |
| Mg | 0.62401700  | 1.21159900  | -0.00978900 |
| Mg | -1.91668500 | -0.18753700 | 0.05166100  |
| Cl | -3.79151300 | -1.36670700 | 0.06695900  |
| Cl | -0.09458000 | -0.53639200 | -1.63645600 |
| Cl | -1.48287700 | 2.23223800  | -0.15319800 |

**TS3<sub>D</sub>-HMg2Cl5-2**

|   |            |             |             |
|---|------------|-------------|-------------|
| H | 1.88795200 | -1.59008600 | -1.24997300 |
|---|------------|-------------|-------------|

|    |             |             |             |
|----|-------------|-------------|-------------|
| C  | 2.81373800  | -1.99524500 | -0.77450100 |
| H  | 3.28936300  | -2.77513600 | -1.36015700 |
| H  | 3.36551600  | -1.01823200 | -0.75624800 |
| C  | 2.58007400  | -2.27271100 | 0.59368600  |
| H  | 2.19689800  | -1.48621300 | 1.23942000  |
| H  | 2.94544800  | -3.17166500 | 1.08312300  |
| H  | 0.55500600  | -2.65516500 | 0.83855300  |
| H  | 0.88992100  | -3.30498800 | 0.61037900  |
| Mg | -1.84776500 | -0.02973600 | -0.01505300 |
| Mg | 0.79840100  | 1.17372300  | 0.01730700  |
| Cl | -1.25292400 | 2.34198500  | -0.07009300 |
| Cl | -0.10035400 | -0.34600500 | 1.72454400  |
| Cl | -0.01372700 | -0.41912900 | -1.67230500 |
| Cl | 3.06122800  | 1.23346400  | 0.09058800  |
| Cl | -3.74720000 | -1.17023400 | -0.03433700 |

**IM1<sub>D</sub>-HMg2Br5-2**

|    |             |             |             |
|----|-------------|-------------|-------------|
| H  | 3.33650200  | 1.51957600  | 0.00387700  |
| C  | 5.20395700  | 0.82386100  | 0.68763600  |
| H  | 4.80521600  | -0.02089000 | 1.23900200  |
| H  | 5.60445800  | 1.65287800  | 1.26207000  |
| C  | 5.21509100  | 0.82521200  | -0.64825100 |
| H  | 5.62514400  | 1.65538400  | -1.21422000 |
| H  | 4.82556200  | -0.01837200 | -1.20792600 |
| Mg | 0.86106700  | -0.47034000 | -0.00409800 |
| Mg | -2.51664200 | -0.08251700 | 0.00208600  |
| Br | -4.84423200 | 0.22438800  | 0.00583000  |
| Br | -0.85738700 | -0.25620400 | 1.87566400  |
| Br | 1.93464800  | 2.01333400  | -0.00809200 |
| Br | -0.86385900 | -0.25507600 | -1.87755200 |
| Br | 2.72099300  | -1.95640600 | -0.00427700 |

**IM2<sub>D</sub>-HMg2Br5-2**

|    |             |             |             |
|----|-------------|-------------|-------------|
| H  | 2.18989000  | -2.20299700 | 0.69615400  |
| C  | 3.24382100  | -2.32497100 | 0.44421000  |
| H  | 3.37287800  | -3.33867900 | 0.04832900  |
| H  | 3.84480400  | -2.23269800 | 1.34927900  |
| C  | 3.68821700  | -1.36955700 | -0.63002300 |
| H  | 4.74173800  | -1.43847100 | -0.88637200 |
| H  | 3.06367300  | -1.37866800 | -1.51858400 |
| Mg | 0.96775600  | 0.60979000  | 0.08844200  |
| Mg | -1.83423400 | -0.08025900 | -0.00187400 |
| Br | -4.11903300 | -0.65832000 | -0.11028000 |
| Br | 0.08699300  | -0.96547200 | -1.66886200 |
| Br | -0.14552100 | -0.55588000 | 2.01013600  |
| Br | -0.76153100 | 2.36610800  | -0.21838800 |
| Br | 3.55602100  | 0.56797300  | -0.00154200 |

**IM3<sub>D</sub>-HMg2Br5-2**

|   |             |             |             |
|---|-------------|-------------|-------------|
| H | -3.31578000 | -1.51726500 | 0.04820300  |
| C | -5.15937800 | -0.82516100 | 0.79695000  |
| H | -5.53989500 | -1.66162500 | 1.37416200  |
| H | -4.74594700 | 0.01445700  | 1.34535400  |
| C | -5.21076100 | -0.81198000 | -0.53784600 |
| H | -4.84063900 | 0.03813600  | -1.10008300 |
| H | -5.63538700 | -1.63682800 | -1.10079300 |
| H | -2.50718200 | -0.19565700 | -3.15841000 |
| H | -2.69184900 | 0.41550500  | -2.77390900 |

|    |             |             |             |
|----|-------------|-------------|-------------|
| Mg | 2.54026300  | 0.08141900  | 0.01162000  |
| Mg | -0.83994600 | 0.46028100  | 0.01228100  |
| Br | -2.68781200 | 1.96359700  | 0.07001200  |
| Br | -1.91677000 | -2.01716200 | 0.00102400  |
| Br | 0.88321300  | 0.26827800  | -1.86279300 |
| Br | 0.88368300  | 0.22909900  | 1.88831900  |
| Br | 4.86893600  | -0.21907700 | 0.00412500  |

**TS1<sub>D-HMg2Br5-2</sub>**

|    |             |             |             |
|----|-------------|-------------|-------------|
| H  | -1.05815700 | -2.04142700 | -0.82322600 |
| C  | -1.51583100 | -3.15744000 | -0.21146800 |
| H  | -0.65481800 | -3.30210200 | 0.43628800  |
| H  | -1.58168400 | -3.78771600 | -1.09457400 |
| C  | -2.65963400 | -2.62949300 | 0.32081400  |
| H  | -3.59552600 | -2.62138000 | -0.22457400 |
| H  | -2.66118800 | -2.15022800 | 1.29198200  |
| Mg | -1.24763200 | 0.86897000  | 0.12747500  |
| Mg | 1.72647500  | 0.16435200  | 0.19057500  |
| Br | 3.92711800  | -0.64027700 | -0.05809200 |
| Br | -0.02773200 | -0.46570700 | 1.96535900  |
| Br | -0.13328000 | -0.81032500 | -1.72547900 |
| Br | 0.65363400  | 2.47871600  | -0.22965800 |
| Br | -3.59522400 | 0.47258200  | -0.06808800 |

**TS2<sub>D-HMg2Br5-2</sub>**

|    |             |             |             |
|----|-------------|-------------|-------------|
| H  | 4.28661000  | -3.45247000 | -0.63014400 |
| C  | 3.84144800  | -2.89216900 | 0.19151600  |
| H  | 4.60473600  | -2.19624900 | 0.56806800  |
| H  | 3.56752900  | -3.54552900 | 1.01979000  |
| C  | 2.72702400  | -2.02288900 | -0.23764200 |
| H  | 2.03886600  | -1.63322400 | 0.50214300  |
| H  | 2.74710000  | -1.53950900 | -1.20124300 |
| H  | 1.13690200  | -2.67794300 | -0.99045700 |
| H  | 1.66302500  | -3.20444600 | -0.69679000 |
| Mg | 1.03305800  | 0.94034200  | 0.00037900  |
| Mg | -1.79884500 | -0.04173900 | 0.07107400  |
| Br | -0.96135900 | 2.43707600  | -0.17154800 |
| Br | 0.03818300  | -0.51862700 | 1.88538200  |
| Br | 0.00759300  | -0.75721900 | -1.78841100 |
| Br | -3.99916200 | -0.90331200 | 0.06814200  |
| Br | 3.47856900  | 0.79798200  | 0.03066300  |

**TS3<sub>D-HMg2Br5-2</sub>**

|    |             |             |             |
|----|-------------|-------------|-------------|
| H  | -1.83792000 | 2.12012500  | -1.20647700 |
| C  | -2.74112900 | 2.66336200  | -0.78780400 |
| H  | -3.00904100 | 3.50601600  | -1.41798300 |
| H  | -3.42831600 | 1.79143100  | -0.83195400 |
| C  | -2.47662300 | 2.94800100  | 0.57217400  |
| H  | -2.36987200 | 2.12789600  | 1.27716700  |
| H  | -2.54659600 | 3.94640700  | 0.99344200  |
| H  | -0.38271800 | 2.70122600  | 0.86483200  |
| H  | -0.59670700 | 3.39013900  | 0.59533000  |
| Mg | 1.75240100  | -0.10513600 | 0.03607000  |
| Mg | -1.16336000 | -0.86578100 | -0.00275600 |
| Br | -3.56405300 | -0.65621800 | 0.06097200  |
| Br | -0.06755200 | 0.79045500  | -1.74706200 |
| Br | 0.01395700  | 0.42889500  | 1.94114900  |
| Br | 0.75412200  | -2.48683600 | -0.24133400 |

|    |            |            |            |
|----|------------|------------|------------|
| Br | 3.96093200 | 0.73512100 | 0.00398000 |
|----|------------|------------|------------|

**IM1<sub>D-HMg2F5-3</sub>**

|    |             |             |             |
|----|-------------|-------------|-------------|
| H  | -2.24162200 | -0.97170000 | -0.28946000 |
| C  | -4.05534300 | -0.91639600 | 0.43288400  |
| H  | -3.74390400 | -0.66409900 | 1.44190000  |
| H  | -4.49002900 | -1.89958300 | 0.28339300  |
| C  | -3.94966300 | -0.02789500 | -0.56159100 |
| H  | -4.28973700 | -0.26760000 | -1.56456200 |
| H  | -3.51122100 | 0.95109200  | -0.38986500 |
| Mg | 2.65740700  | -0.13113800 | -0.01167700 |
| Mg | -0.17529200 | 0.54288500  | 0.10165600  |
| F  | -1.27836800 | -1.11248600 | -0.35349300 |
| F  | 1.28978700  | 0.53441100  | -1.16746800 |
| F  | 1.23564300  | -0.10336500 | 1.26381900  |
| F  | -1.57168400 | 1.66163200  | 0.37107500  |
| F  | 4.38253100  | -0.58278400 | -0.09047800 |

**IM2<sub>D-HMg2F5-3</sub>**

|    |             |             |             |
|----|-------------|-------------|-------------|
| H  | -3.13608700 | 0.01853300  | 1.28343300  |
| C  | -3.46766000 | -0.84179000 | 0.70042500  |
| H  | -4.55992100 | -0.80800500 | 0.63797600  |
| H  | -3.18249700 | -1.77340600 | 1.19284300  |
| C  | -2.91702100 | -0.76640400 | -0.69263900 |
| H  | -3.18886900 | -1.60264300 | -1.33311400 |
| H  | -3.10164100 | 0.19165900  | -1.17243100 |
| Mg | 2.47786900  | -0.15976100 | 0.05439000  |
| Mg | -0.30801600 | 0.69151000  | 0.02680100  |
| F  | 0.97281200  | -0.13332500 | 1.22861900  |
| F  | -1.44445200 | -0.86224500 | -0.62421400 |
| F  | 1.24428500  | 0.68327700  | -1.13501100 |
| F  | -1.67159800 | 1.84541600  | 0.29489800  |
| F  | 4.16993600  | -0.72845300 | 0.05462800  |

**IM3<sub>D-HMg2F5-3</sub>**

|    |             |             |             |
|----|-------------|-------------|-------------|
| H  | -2.20131400 | -0.81761100 | -0.65264100 |
| C  | -3.95648800 | -1.21589100 | 0.11890200  |
| H  | -4.37372200 | -2.04276300 | -0.44685800 |
| H  | -3.57487100 | -1.44184500 | 1.10993100  |
| C  | -3.95197500 | 0.03605800  | -0.35212400 |
| H  | -3.52807100 | 0.85055200  | 0.22849600  |
| H  | -4.36114700 | 0.26667500  | -1.33112000 |
| H  | -1.35635500 | 2.34937800  | -1.27450900 |
| H  | -0.87061700 | 2.24356100  | -1.83221800 |
| Mg | -0.15633100 | 0.48552900  | 0.27133100  |
| Mg | 2.67309400  | -0.17444900 | -0.01179900 |
| F  | 4.39426600  | -0.60110400 | -0.21943700 |
| F  | 1.19959000  | -0.62673000 | 1.11023000  |
| F  | -1.24254200 | -0.85264100 | -0.82399900 |
| F  | 1.36851800  | 0.95028000  | -0.83667500 |
| F  | -1.55142000 | 1.34554000  | 1.04586500  |

**TS1<sub>D-HMg2F5-3</sub>**

|   |            |            |             |
|---|------------|------------|-------------|
| H | 0.78977800 | 1.21456600 | 0.91517400  |
| C | 1.62858800 | 2.04812200 | 0.58082900  |
| H | 2.43317300 | 1.73256400 | 1.24469900  |
| H | 1.16290100 | 3.00731000 | 0.79114200  |
| C | 1.72186400 | 1.63562800 | -0.74148000 |

|    |             |             |             |
|----|-------------|-------------|-------------|
| H  | 1.18536400  | 2.12793600  | -1.54251500 |
| H  | 2.35862600  | 0.79330700  | -1.00019900 |
| Mg | -1.64443600 | 0.01136800  | -0.03792300 |
| Mg | 0.67487400  | -1.27599100 | 0.03884200  |
| F  | -0.08812000 | 0.15219300  | 1.30153000  |
| F  | -0.00280300 | 0.14715500  | -1.18412600 |
| F  | -1.13533700 | -1.87712700 | 0.02835000  |
| F  | 2.48218600  | -1.26712400 | -0.01261700 |
| F  | -3.07790500 | 1.08904800  | -0.07263000 |

**TS2<sub>D-HMg2F5-3</sub>**

|    |             |             |             |
|----|-------------|-------------|-------------|
| H  | 3.30837500  | 2.43518300  | -0.78265600 |
| C  | 2.44968700  | 2.27191300  | -0.13310100 |
| H  | 1.56186000  | 2.66975400  | -0.65939900 |
| H  | 2.52982900  | 2.81077300  | 0.80994300  |
| C  | 2.06994700  | 0.86737400  | 0.01487400  |
| H  | 1.41029900  | 0.57554300  | 0.82500400  |
| H  | 2.20903600  | 0.17524600  | -0.79810900 |
| H  | 3.48746200  | 0.24230600  | 0.89081800  |
| H  | 3.16770300  | -0.44852100 | 0.70609400  |
| Mg | -1.69273800 | 0.37512200  | 0.03615000  |
| Mg | 0.16357600  | -1.45304900 | -0.06846100 |
| F  | -0.39776500 | -0.28967000 | 1.40119600  |
| F  | 1.94815800  | -1.89495600 | 0.00409300  |
| F  | -1.69182600 | -1.53803900 | -0.49391300 |
| F  | -2.83538100 | 1.76386000  | 0.10807600  |
| F  | 0.03876800  | 0.36315100  | -1.00774100 |

**TS3<sub>D-HMg2F5-3</sub>**

|    |             |             |             |
|----|-------------|-------------|-------------|
| H  | 0.95782400  | 1.36620600  | -0.68421300 |
| C  | 1.63581500  | 1.99529400  | -0.01293500 |
| H  | 1.76792400  | 2.99867200  | -0.40528100 |
| H  | 0.96721400  | 1.90660000  | 0.86426200  |
| C  | 2.81096900  | 1.25513500  | 0.25072500  |
| H  | 2.75397900  | 0.31047700  | 0.78740800  |
| H  | 3.80438900  | 1.65773400  | 0.07578500  |
| H  | 3.01394200  | -0.30693200 | -1.09389800 |
| H  | 3.29955200  | 0.32220300  | -1.44136600 |
| Mg | 0.34070200  | -1.28882500 | 0.04615700  |
| Mg | -1.78068100 | 0.20617000  | 0.00129500  |
| F  | -3.11212400 | 1.41467300  | -0.04988700 |
| F  | -0.28016400 | 0.07104800  | 1.31733800  |
| F  | -0.13819600 | 0.19265000  | -1.21064000 |
| F  | -1.50733400 | -1.74602800 | -0.10932600 |
| F  | 2.15273300  | -1.57297300 | 0.04153000  |

**IM1<sub>D-HMg2Cl5-3</sub>**

|    |             |             |             |
|----|-------------|-------------|-------------|
| Cl | -4.84666800 | -0.42095100 | 0.00057000  |
| Cl | 1.62261500  | -1.75140000 | 0.01456000  |
| H  | 2.89767300  | -1.32224000 | 0.00928700  |
| C  | 4.74958000  | -0.66632500 | -0.66735600 |
| H  | 4.36680600  | 0.17912400  | -1.22888300 |
| H  | 5.14214400  | -1.50670300 | -1.23080300 |
| C  | 4.75292600  | -0.65430900 | 0.66850100  |
| H  | 5.14830100  | -1.48448300 | 1.24496500  |
| H  | 4.37274800  | 0.20102700  | 1.21663400  |
| Mg | -2.68943700 | 0.00011200  | 0.00029400  |
| Mg | 0.54609200  | 0.55251700  | -0.00316700 |

|    |             |            |             |
|----|-------------|------------|-------------|
| Cl | 2.29402700  | 1.93408500 | -0.01140700 |
| Cl | -1.10101200 | 0.28625100 | 1.71689600  |
| Cl | -1.09970200 | 0.25940000 | -1.71965300 |

**IM2<sub>D-HMg2Cl5-3</sub>**

|    |             |             |             |
|----|-------------|-------------|-------------|
| Cl | -4.57464900 | -0.64863000 | -0.03794500 |
| Cl | -0.66495200 | -0.60093800 | -1.52622300 |
| H  | 2.82592000  | -2.84350700 | -0.62006500 |
| C  | 3.31052300  | -1.86954600 | -0.69881200 |
| H  | 2.77288300  | -1.25232200 | -1.41975300 |
| H  | 4.32474600  | -2.01759300 | -1.08316100 |
| C  | 3.41944000  | -1.18623800 | 0.64070100  |
| H  | 3.95228600  | -1.76869400 | 1.38777800  |
| H  | 3.81083100  | -0.17488200 | 0.57517000  |
| Mg | -2.46305200 | -0.04289700 | -0.11682200 |
| Mg | 0.71195500  | 0.76837100  | -0.10522700 |
| Cl | 2.48347700  | 1.88641000  | -0.85974600 |
| Cl | 1.73501800  | -0.96364200 | 1.41381000  |
| Cl | -1.15849900 | 1.36715400  | 1.25559200  |

**IM3<sub>D-HMg2Cl5-3</sub>**

|    |             |             |             |
|----|-------------|-------------|-------------|
| H  | 2.85884700  | -1.29290900 | 0.33595200  |
| C  | 4.64510900  | -0.91316700 | -0.66284400 |
| H  | 4.98266600  | -1.89272100 | -0.98587200 |
| H  | 4.21921300  | -0.25657800 | -1.41395600 |
| C  | 4.76401300  | -0.51307100 | 0.60612800  |
| H  | 4.43745900  | 0.47557100  | 0.90927700  |
| H  | 5.20368300  | -1.15047600 | 1.36652300  |
| H  | 2.24535700  | 1.34976900  | 2.42160000  |
| H  | 1.97882000  | 0.89186500  | 2.94593600  |
| Cl | 2.25884600  | 1.83399800  | -0.62208300 |
| Cl | 1.58817800  | -1.66937300 | 0.56668300  |
| Mg | 0.51943100  | 0.52325000  | -0.14190300 |
| Mg | -2.72020200 | -0.01202200 | -0.04015500 |
| Cl | -4.87823600 | -0.41857200 | 0.05954400  |
| Cl | -1.09858000 | -0.27331200 | -1.72591500 |
| Cl | -1.16265100 | 0.78009400  | 1.54209700  |

**TS1<sub>D-HMg2Cl5-3</sub>**

|    |             |             |             |
|----|-------------|-------------|-------------|
| Cl | 3.73662400  | 0.89379800  | -0.01308000 |
| Cl | -0.03868900 | 0.50935200  | -1.65313600 |
| H  | -1.08768100 | 1.67944700  | -0.87910000 |
| C  | -1.98514700 | 2.55386800  | -0.61980200 |
| H  | -2.79174400 | 2.11385700  | -1.20272300 |
| H  | -1.50623500 | 3.44454700  | -1.01893300 |
| C  | -1.99059200 | 2.35072300  | 0.73984700  |
| H  | -1.34447500 | 2.91109900  | 1.40546000  |
| H  | -2.61589000 | 1.58076000  | 1.17935500  |
| Mg | 1.76785900  | -0.10059800 | 0.09246300  |
| Mg | -1.01907000 | -1.13204500 | 0.04707100  |
| Cl | -3.23948200 | -0.92061200 | -0.02311500 |
| Cl | -0.00531500 | 0.35021200  | 1.71088500  |
| Cl | 0.97127400  | -2.38366400 | -0.13206900 |

**TS2<sub>D-HMg2Cl5-3</sub>**

|   |            |            |             |
|---|------------|------------|-------------|
| H | 3.03688200 | 3.67760600 | -0.70218200 |
| C | 2.19380900 | 3.27696600 | -0.14061200 |
| H | 1.28352300 | 3.47504600 | -0.72867600 |

|    |             |             |             |
|----|-------------|-------------|-------------|
| H  | 2.06692200  | 3.77682200  | 0.81920400  |
| C  | 2.20648200  | 1.80926400  | -0.02984700 |
| H  | 1.58201100  | 1.32434000  | 0.71222300  |
| H  | 2.58555700  | 1.19859300  | -0.83495400 |
| H  | 3.60031000  | 1.66914000  | 0.93590200  |
| H  | 3.56035000  | 0.89545300  | 0.79152000  |
| Cl | -3.69912500 | 1.16228600  | 0.10808800  |
| Cl | -1.25468300 | -2.30799300 | -0.52048700 |
| Mg | -1.80464700 | 0.01612100  | 0.05719900  |
| Mg | 0.80720600  | -1.27468000 | -0.06503600 |
| Cl | 3.07959800  | -1.33035500 | 0.03652900  |
| Cl | -0.11249300 | -0.07716300 | 1.83884000  |
| Cl | 0.09564400  | 0.70430300  | -1.45569000 |

**TS3<sub>D-HMg2Cl5-3</sub>**

|    |             |             |             |
|----|-------------|-------------|-------------|
| H  | 0.80457600  | 2.09877100  | -0.69804000 |
| C  | 1.28279000  | 2.88136100  | -0.01067600 |
| H  | 1.17562900  | 3.87544400  | -0.43375300 |
| H  | 0.63466700  | 2.66009800  | 0.85392800  |
| C  | 2.59688100  | 2.43466400  | 0.24548900  |
| H  | 2.76295200  | 1.51797000  | 0.80710700  |
| H  | 3.47580100  | 3.03227500  | 0.02486400  |
| H  | 3.16876300  | 0.90816400  | -1.17593000 |
| H  | 3.14391300  | 1.61653300  | -1.47546200 |
| Cl | 3.17852700  | -1.14580100 | 0.04113400  |
| Cl | 0.00974600  | 0.42004500  | -1.65913700 |
| Mg | 0.92141800  | -1.16307100 | 0.03275700  |
| Mg | -1.79462500 | -0.11437700 | 0.03477200  |
| Cl | -3.71427100 | 0.98977600  | -0.00949400 |
| Cl | -0.05015800 | 0.27147100  | 1.73905800  |
| Cl | -1.06889500 | -2.43408100 | -0.11873300 |

**IM1<sub>D-HMg2Br5-3</sub>**

|    |             |             |             |
|----|-------------|-------------|-------------|
| H  | -3.33669700 | 1.51939200  | 0.00055700  |
| C  | -5.21023800 | 0.82436900  | -0.66618500 |
| H  | -4.81641100 | -0.01963200 | -1.22222100 |
| H  | -5.61602200 | 1.65406800  | -1.23591900 |
| C  | -5.20926600 | 0.82405300  | 0.66976400  |
| H  | -5.61421800 | 1.65348100  | 1.24048500  |
| H  | -4.81463900 | -0.02021700 | 1.22482200  |
| Mg | 2.51668400  | -0.08245400 | 0.00016300  |
| Mg | -0.86103900 | -0.47026300 | -0.00041600 |
| Br | 0.86091600  | -0.25512000 | -1.87673100 |
| Br | -2.72084200 | -1.95648500 | -0.00064300 |
| Br | -1.93483500 | 2.01332400  | -0.00039300 |
| Br | 4.84430300  | 0.22427600  | 0.00052500  |
| Br | 0.86038000  | -0.25585300 | 1.87649500  |

**IM2<sub>D-HMg2Br5-3</sub>**

|    |             |             |             |
|----|-------------|-------------|-------------|
| H  | 3.00030600  | -3.16450000 | -0.87819600 |
| C  | 3.50062600  | -2.19613600 | -0.91500300 |
| H  | 2.93393300  | -1.51888300 | -1.55487400 |
| H  | 4.48564400  | -2.33424500 | -1.37395000 |
| C  | 3.71195200  | -1.61376900 | 0.45917200  |
| H  | 4.26818100  | -2.25922800 | 1.13364900  |
| H  | 4.11891400  | -0.60664500 | 0.44485600  |
| Mg | -2.37560000 | 0.06799300  | -0.13971300 |
| Mg | 0.97661400  | 0.60090600  | -0.08105900 |

|    |             |             |             |
|----|-------------|-------------|-------------|
| Br | -0.91740200 | 1.36484000  | 1.44526900  |
| Br | 2.90905700  | 1.75104100  | -0.86239200 |
| Br | -0.55951900 | -0.65992000 | -1.70319900 |
| Br | -4.68188700 | -0.36979900 | -0.09442600 |
| Br | 1.95561900  | -1.37998600 | 1.43225500  |

**IM3<sub>D-HMg2Br5-3</sub>**

|    |             |             |             |
|----|-------------|-------------|-------------|
| H  | -2.76020600 | -1.37859000 | 1.16893700  |
| C  | -4.53313900 | -1.86785800 | 0.14862200  |
| H  | -5.08681500 | -2.40544900 | 0.91166300  |
| H  | -4.82529600 | -0.84285800 | -0.05362700 |
| C  | -3.54443100 | -2.44643800 | -0.53804500 |
| H  | -3.01539600 | -1.90565700 | -1.31568100 |
| H  | -3.24661300 | -3.47445500 | -0.36015700 |
| H  | 2.40644000  | -1.41927600 | 1.85893700  |
| H  | 1.65886500  | -1.36039200 | 1.84071800  |
| Mg | 2.33070200  | -0.08360900 | -0.10652700 |
| Mg | -0.97093800 | 0.64972900  | -0.22977900 |
| Br | -2.98501400 | 1.36975200  | -1.26249100 |
| Br | 0.42534800  | -1.21448600 | -1.29668300 |
| Br | -1.76252200 | -0.68186000 | 2.01436200  |
| Br | 1.00744600  | 1.87528400  | 0.78361800  |
| Br | 4.65809200  | -0.43786000 | -0.17248000 |

**TS1<sub>D-HMg2Br5-3</sub>**

|    |             |             |             |
|----|-------------|-------------|-------------|
| H  | 1.07475300  | -2.02632700 | -0.90484800 |
| C  | 1.96239400  | -2.99924000 | -0.64128000 |
| H  | 2.78271700  | -2.58410500 | -1.22199800 |
| H  | 1.41609600  | -3.83345900 | -1.07350100 |
| C  | 1.97290700  | -2.82920400 | 0.71541600  |
| H  | 1.28116800  | -3.35517600 | 1.36285200  |
| H  | 2.64356300  | -2.11258200 | 1.17659700  |
| Mg | -1.71274300 | 0.16432800  | 0.16261800  |
| Mg | 1.28488900  | 0.86650200  | 0.10389500  |
| Br | -0.62309000 | 2.48304800  | -0.17234800 |
| Br | 3.62817200  | 0.47109100  | -0.03535800 |
| Br | 0.08621500  | -0.78249500 | -1.75649000 |
| Br | -3.93700700 | -0.58949100 | -0.03060000 |
| Br | 0.05497200  | -0.53894300 | 1.90959400  |

**TS2<sub>D-HMg2Br5-3</sub>**

|    |             |             |             |
|----|-------------|-------------|-------------|
| H  | 2.69331300  | 4.38358500  | -0.69379900 |
| C  | 1.89499900  | 3.87371700  | -0.15527100 |
| H  | 0.97145700  | 4.00128400  | -0.73892500 |
| H  | 1.71640700  | 4.32375500  | 0.82131500  |
| C  | 2.09014700  | 2.41404900  | -0.07854600 |
| H  | 1.53743200  | 1.83807700  | 0.65400100  |
| H  | 2.56665600  | 1.87475000  | -0.88194000 |
| H  | 3.47542100  | 2.37800800  | 0.88862900  |
| H  | 3.60496800  | 1.60032200  | 0.76702000  |
| Mg | -1.72009300 | -0.11623700 | 0.08001300  |
| Mg | 1.17586800  | -0.92085100 | -0.05425600 |
| Br | -3.95138900 | 0.66171700  | 0.10714900  |
| Br | 0.03378400  | 0.15575700  | 2.00059700  |
| Br | 0.08532900  | 1.00247400  | -1.59102600 |
| Br | 3.59879400  | -0.66380900 | 0.03849000  |
| Br | -0.73640000 | -2.46132000 | -0.54728100 |

**TS3<sub>D-HMg2Br5-3</sub>**

|    |             |             |             |
|----|-------------|-------------|-------------|
| H  | -0.29617700 | 2.34005300  | -0.90610100 |
| C  | -0.59473800 | 3.31499700  | -0.33099200 |
| H  | -0.93368600 | 4.00139400  | -1.10406800 |
| H  | -1.38457700 | 2.89530200  | 0.29894800  |
| C  | 0.56699600  | 3.69287800  | 0.37158900  |
| H  | 0.80237800  | 3.23431400  | 1.32569900  |
| H  | 1.19238200  | 4.51805900  | 0.04702700  |
| H  | 2.45427700  | 2.10890300  | -0.28862200 |
| H  | 1.98109200  | 2.72186100  | -0.36036700 |
| Mg | 1.46116500  | -0.64488300 | 0.07513500  |
| Mg | -1.54780000 | -0.57769700 | 0.07825400  |
| Br | -3.78160700 | 0.21080200  | -0.00978600 |
| Br | 0.01280600  | 0.49423700  | 1.88276600  |
| Br | 0.01296500  | 0.49147600  | -1.85375100 |
| Br | -0.06846300 | -2.68407500 | -0.01830500 |
| Br | 3.74973900  | 0.08195600  | -0.03226000 |

**IM1<sub>T-HMg2F5-4</sub>**

|    |             |             |             |
|----|-------------|-------------|-------------|
| H  | 2.62350300  | -0.50240400 | -0.02463100 |
| C  | 3.37760500  | 1.08090500  | 0.64768000  |
| H  | 4.37508900  | 0.80673600  | 0.97614500  |
| H  | 2.63701300  | 1.27171600  | 1.41866000  |
| C  | 3.07586300  | 1.24067300  | -0.64783100 |
| H  | 2.07491700  | 1.53543300  | -0.94941200 |
| H  | 3.82165100  | 1.09123100  | -1.42251100 |
| Mg | -1.93034600 | 0.37665400  | 0.01892200  |
| Mg | 0.15221000  | -1.07161600 | -0.01860800 |
| F  | -1.03740800 | -0.77780000 | 1.42509200  |
| F  | -3.37612100 | 1.44359600  | 0.03672700  |
| F  | -1.38140100 | -1.21762000 | -1.11258100 |
| F  | 0.02688800  | 0.82060200  | -0.31926200 |
| F  | 2.11078100  | -1.35684900 | -0.03009900 |

**IM2<sub>T-HMg2F5-4</sub>**

|    |             |             |             |
|----|-------------|-------------|-------------|
| H  | -3.14304200 | 0.03977200  | 1.27268300  |
| C  | -3.47155800 | -0.83017000 | 0.70238100  |
| H  | -4.56349500 | -0.79836500 | 0.63436700  |
| H  | -3.18806800 | -1.75350400 | 1.21098600  |
| C  | -2.91474800 | -0.77694500 | -0.68913700 |
| H  | -3.18291600 | -1.62379300 | -1.31710000 |
| H  | -3.09846000 | 0.17274800  | -1.18557600 |
| Mg | 2.47805200  | -0.15870300 | 0.05500700  |
| Mg | -0.30818800 | 0.69140200  | 0.02387200  |
| F  | 0.97456600  | -0.12240000 | 1.23109000  |
| F  | 4.17017900  | -0.72750300 | 0.05741600  |
| F  | 1.24269800  | 0.67403500  | -1.13980400 |
| F  | -1.44251000 | -0.86982900 | -0.61295600 |
| F  | -1.67210500 | 1.84719100  | 0.28187900  |

**IM3<sub>T-HMg2F5-4</sub>**

|   |             |             |             |
|---|-------------|-------------|-------------|
| H | -2.52296200 | 0.30733500  | -0.00123700 |
| C | -2.65565700 | -1.47287100 | -0.66876200 |
| H | -3.58024600 | -1.54183100 | -1.23351900 |
| H | -1.72591800 | -1.42643800 | -1.22955100 |
| C | -2.65449800 | -1.47111400 | 0.67135800  |
| H | -1.72384500 | -1.42321700 | 1.23052600  |
| H | -3.57810100 | -1.53855700 | 1.23790800  |

|    |             |             |             |
|----|-------------|-------------|-------------|
| H  | 0.05705600  | 3.38915500  | 0.01116200  |
| H  | -0.69534400 | 3.40739000  | 0.01198900  |
| Mg | 1.75097900  | -0.44951700 | 0.00005500  |
| Mg | -0.19437200 | 1.20112900  | -0.00132500 |
| F  | 3.07890500  | -1.66080400 | 0.00125900  |
| F  | 1.67449700  | 1.56635100  | -0.00369600 |
| F  | 0.21909100  | -0.15789900 | 1.28887800  |
| F  | 0.21708800  | -0.16265200 | -1.28729700 |
| F  | -2.19502600 | 1.24508500  | -0.00221200 |

**TS1<sub>T-HMg2F5-4</sub>**

|    |             |             |             |
|----|-------------|-------------|-------------|
| H  | 2.63886300  | -0.14247800 | 0.00006100  |
| C  | 3.15739900  | 1.00862200  | 0.00004900  |
| H  | 3.73066600  | 0.94789200  | -0.92339400 |
| H  | 3.73050000  | 0.94797000  | 0.92360100  |
| C  | 2.05756500  | 1.85613100  | -0.00008300 |
| H  | 1.64244900  | 2.25285400  | 0.91670500  |
| H  | 1.64262300  | 2.25279800  | -0.91697400 |
| Mg | -1.80552700 | 0.26228400  | -0.00004700 |
| Mg | 0.30038500  | -1.23170700 | 0.00005200  |
| F  | -1.09954000 | -1.07656900 | 1.29124300  |
| F  | -3.12991900 | 1.47688200  | -0.00007300 |
| F  | -1.09969200 | -1.07696500 | -1.29100700 |
| F  | 0.20397800  | 0.75209700  | -0.00023700 |
| F  | 2.16815400  | -1.38816300 | 0.00009000  |

**TS2<sub>T-HMg2F5-4</sub>**

|    |             |             |             |
|----|-------------|-------------|-------------|
| H  | 4.18280600  | -1.57117800 | -0.64023100 |
| C  | 3.58312200  | -1.22713300 | 0.20124900  |
| H  | 3.99734000  | -0.25631100 | 0.52622200  |
| H  | 3.63509400  | -1.90679200 | 1.05048400  |
| C  | 2.21721900  | -0.82841400 | -0.15999700 |
| H  | 1.46836700  | -0.71412500 | 0.61762600  |
| H  | 2.03308700  | -0.34863300 | -1.10639100 |
| H  | 1.02130800  | -1.90963600 | -0.85262400 |
| H  | 1.62177200  | -2.36205700 | -0.62768700 |
| Mg | 0.13206300  | 1.28308600  | -0.01710900 |
| Mg | -1.86386900 | -0.36845100 | 0.04666800  |
| F  | -1.73561600 | 1.60647500  | -0.17590100 |
| F  | -0.37015900 | -0.03719800 | 1.33814700  |
| F  | -0.26302700 | -0.32292500 | -1.17581100 |
| F  | -3.14900300 | -1.62867700 | 0.07167400  |
| F  | 1.96445400  | 1.54081400  | -0.01029000 |

**TS3<sub>T-HMg2F5-4</sub>**

|    |             |             |             |
|----|-------------|-------------|-------------|
| H  | 2.77380900  | -0.18187000 | -0.08617100 |
| C  | 3.12773800  | 0.88326300  | -0.40542700 |
| H  | 4.16570700  | 1.04034200  | -0.12717300 |
| H  | 2.96203900  | 0.71882500  | -1.48021300 |
| C  | 2.18838500  | 1.82381200  | 0.07382000  |
| H  | 1.17875200  | 1.79674200  | -0.33386100 |
| H  | 2.46902700  | 2.66868500  | 0.69451800  |
| H  | 0.97672700  | 0.92002900  | 1.70065100  |
| H  | 1.66980400  | 1.26226100  | 1.79369600  |
| Mg | -1.83168700 | 0.28355100  | -0.05883500 |
| Mg | 0.25478900  | -1.24635000 | 0.01310300  |
| F  | -3.16635700 | 1.48944500  | -0.08422400 |
| F  | -0.49890000 | -0.09061800 | 1.41466300  |

|   |             |             |             |
|---|-------------|-------------|-------------|
| F | -0.08104300 | 0.38818900  | -1.04325000 |
| F | -1.56731200 | -1.65656900 | -0.37389000 |
| F | 2.07252100  | -1.56532200 | 0.12858900  |

**IM1<sub>T-HMg2Cl5-4</sub>**

|    |             |             |             |
|----|-------------|-------------|-------------|
| Cl | 3.87479800  | -1.17910000 | -0.00768800 |
| Cl | -0.05259900 | -0.70484000 | -1.52128100 |
| H  | -3.16620100 | -0.16810100 | 0.02269600  |
| C  | -3.37900300 | -2.01945100 | -0.62615200 |
| H  | -2.71166300 | -1.97315400 | -1.48022900 |
| H  | -4.44470100 | -2.06292700 | -0.82712900 |
| C  | -2.89777900 | -2.06130900 | 0.62206200  |
| H  | -3.55467600 | -2.13224800 | 1.48308400  |
| H  | -1.83099000 | -2.04195200 | 0.81931600  |
| Mg | 1.89445700  | -0.19917100 | -0.00279500 |
| Mg | -0.64144400 | 1.01111400  | -0.00977800 |
| Cl | -3.07281800 | 1.20363900  | 0.03858200  |
| Cl | 1.31260200  | 2.22657600  | -0.34110600 |
| Cl | 0.19288600  | -0.18629700 | 1.84076800  |

**IM2<sub>T-HMg2Cl5-4</sub>**

|    |             |             |             |
|----|-------------|-------------|-------------|
| Cl | 3.76704400  | 0.59861800  | -0.00968900 |
| Cl | 0.23146700  | -0.41499900 | 1.92480800  |
| H  | -2.44511300 | 3.16885200  | -1.06529500 |
| C  | -2.18406300 | 2.83787700  | -0.05901200 |
| H  | -2.78614100 | 1.96393100  | 0.19495300  |
| H  | -2.43152300 | 3.64200600  | 0.64159900  |
| C  | -0.70754100 | 2.55807500  | 0.06736400  |
| H  | -0.06972000 | 3.38471500  | -0.23447500 |
| H  | -0.41334200 | 2.18450700  | 1.04510000  |
| Mg | 1.82550200  | -0.42617800 | 0.14951200  |
| Mg | -1.17570600 | -1.06265700 | 0.09661700  |
| Cl | -3.38074700 | -0.96984100 | 0.03494100  |
| Cl | 0.63268000  | -2.10116300 | -1.05643000 |
| Cl | -0.20939100 | 1.19010800  | -1.10454300 |

**IM3<sub>T-HMg2Cl5-4</sub>**

|    |             |             |             |
|----|-------------|-------------|-------------|
| H  | -3.12749200 | -0.16784000 | -0.13541400 |
| C  | -3.31700000 | -2.02610300 | -0.77518900 |
| H  | -4.37490600 | -2.07180200 | -1.01337100 |
| H  | -2.62003300 | -1.98662500 | -1.60559700 |
| C  | -2.88062800 | -2.05725900 | 0.48957600  |
| H  | -1.82137500 | -2.03588400 | 0.72410400  |
| H  | -3.56657200 | -2.12017900 | 1.32778800  |
| H  | -2.50286600 | 0.01517800  | 3.17090800  |
| H  | -3.22354400 | 0.18072800  | 3.26169400  |
| Cl | 3.92861700  | -1.16443400 | 0.06923500  |
| Cl | 0.04435200  | -0.72368200 | -1.56121100 |
| Mg | 1.94354600  | -0.19642900 | 0.00532600  |
| Mg | -0.60040400 | 0.99972600  | -0.08054300 |
| Cl | -3.02862100 | 1.20322900  | -0.13407400 |
| Cl | 1.35768200  | 2.22272500  | -0.35928400 |
| Cl | 0.18649100  | -0.18213000 | 1.80216800  |

**TS1<sub>T-HMg2Cl5-4</sub>**

|    |             |             |             |
|----|-------------|-------------|-------------|
| Cl | -3.74509700 | -1.10444800 | -0.00273100 |
| Cl | -0.04293000 | -0.29528200 | 1.76553000  |
| H  | 2.92136200  | -0.73403900 | 0.03588700  |

|    |             |             |             |
|----|-------------|-------------|-------------|
| C  | 3.02202200  | -1.99035600 | 0.30488700  |
| H  | 3.04642900  | -1.90863700 | 1.38944000  |
| H  | 3.96882100  | -2.17969000 | -0.19637600 |
| C  | 1.86623300  | -2.45613100 | -0.27821700 |
| H  | 1.83361000  | -2.76885000 | -1.31515400 |
| H  | 0.93690100  | -2.49722100 | 0.27676000  |
| Mg | -1.80281000 | -0.04588400 | 0.03240700  |
| Mg | 0.81104000  | 1.10355600  | 0.01205600  |
| Cl | 3.13051800  | 0.98539700  | -0.06234000 |
| Cl | -1.17106000 | 2.34094400  | -0.13722300 |
| Cl | 0.05589600  | -0.51041800 | -1.61524300 |

**TS2<sub>T-HMg2Cl5-4</sub>**

|    |             |             |             |
|----|-------------|-------------|-------------|
| H  | 3.03688200  | 3.67760600  | -0.70218200 |
| C  | 2.19380900  | 3.27696600  | -0.14061200 |
| H  | 1.28352300  | 3.47504600  | -0.72867600 |
| H  | 2.06692200  | 3.77682200  | 0.81920400  |
| C  | 2.20648200  | 1.80926400  | -0.02984700 |
| H  | 1.58201100  | 1.32434000  | 0.71222300  |
| H  | 2.58555700  | 1.19859300  | -0.83495400 |
| H  | 3.60031000  | 1.66914000  | 0.93590200  |
| H  | 3.56035000  | 0.89545300  | 0.79152000  |
| Cl | -3.69912500 | 1.16228600  | 0.10808800  |
| Cl | -1.25468300 | -2.30799300 | -0.52048700 |
| Mg | -1.80464700 | 0.01612100  | 0.05719900  |
| Mg | 0.80720600  | -1.27468000 | -0.06503600 |
| Cl | 3.07959800  | -1.33035500 | 0.03652900  |
| Cl | -0.11249300 | -0.07716300 | 1.83884000  |
| Cl | 0.09564400  | 0.70430300  | -1.45569000 |

**TS3<sub>T-HMg2Cl5-4</sub>**

|    |             |             |             |
|----|-------------|-------------|-------------|
| H  | -3.14753500 | -0.75337500 | -0.42067300 |
| C  | -3.11268300 | -1.87085500 | -0.67543200 |
| H  | -4.12787500 | -2.24494400 | -0.77424700 |
| H  | -2.55380000 | -1.78340800 | -1.61771000 |
| C  | -2.30550500 | -2.50451100 | 0.30313600  |
| H  | -1.23265700 | -2.32891400 | 0.30435900  |
| H  | -2.67104900 | -3.30486900 | 0.93888500  |
| H  | -1.97213300 | -1.19894300 | 1.87475800  |
| H  | -2.67727300 | -1.51080200 | 1.86927700  |
| Cl | 3.78822900  | -1.19143800 | -0.00739500 |
| Cl | -0.03119200 | -0.61425400 | -1.54944700 |
| Mg | 1.87195800  | -0.08052300 | -0.03788400 |
| Mg | -0.74533800 | 1.14177200  | -0.01799200 |
| Cl | -3.02673100 | 1.26899300  | 0.08201200  |
| Cl | 1.29282800  | 2.29306100  | -0.28654300 |
| Cl | 0.17522100  | -0.18915800 | 1.80429300  |

**IM1<sub>T-HMg2Br5-4</sub>**

|    |             |             |             |
|----|-------------|-------------|-------------|
| H  | -3.45919600 | -0.77376700 | 0.00976100  |
| C  | -3.43313900 | -2.65854800 | -0.62136800 |
| H  | -2.82155200 | -2.52370300 | -1.50719000 |
| H  | -4.49341400 | -2.83548900 | -0.77072300 |
| C  | -2.88722900 | -2.64960300 | 0.60049500  |
| H  | -3.48476500 | -2.80638200 | 1.49263400  |
| H  | -1.82294000 | -2.49619200 | 0.74424200  |
| Mg | 1.80024700  | -0.08267500 | 0.00290400  |
| Mg | -0.97232100 | 0.73701500  | -0.00969100 |

|    |             |             |             |
|----|-------------|-------------|-------------|
| Br | 0.84113900  | 2.39324000  | -0.36478800 |
| Br | -3.56737000 | 0.73847500  | 0.02371300  |
| Br | -0.11982200 | -0.97376800 | -1.64944400 |
| Br | 0.04724000  | -0.37915800 | 1.99885800  |
| Br | 4.05792600  | -0.76643700 | -0.00154000 |

**IM2<sub>T-HMg2Br5-4</sub>**

|    |             |             |             |
|----|-------------|-------------|-------------|
| H  | -2.21181400 | 3.62288500  | -1.02330800 |
| C  | -1.86865800 | 3.30090000  | -0.03937300 |
| H  | -2.50502100 | 2.48427600  | 0.30419100  |
| H  | -1.98537100 | 4.14058700  | 0.65449900  |
| C  | -0.41063600 | 2.91732500  | -0.05093300 |
| H  | 0.25210000  | 3.68200700  | -0.44648000 |
| H  | -0.04494800 | 2.54187000  | 0.90078900  |
| Mg | 1.72119100  | -0.48938600 | 0.21245800  |
| Mg | -1.42209800 | -0.75656300 | 0.15802900  |
| Br | 0.30586200  | -2.24920100 | -0.95925300 |
| Br | -3.74836100 | -0.39641700 | 0.01922300  |
| Br | 0.07957800  | -0.11891300 | 2.12310500  |
| Br | -0.09350800 | 1.36500200  | -1.30786200 |
| Br | 3.93019200  | 0.29011200  | 0.00210900  |

**IM3<sub>T-HMg2Br5-4</sub>**

|    |             |             |             |
|----|-------------|-------------|-------------|
| H  | -3.44079900 | -0.74238600 | -0.11671300 |
| C  | -3.41289400 | -2.59978500 | -0.82561100 |
| H  | -4.46990800 | -2.76454000 | -1.00821800 |
| H  | -2.77946600 | -2.43004500 | -1.68976300 |
| C  | -2.89773500 | -2.64615900 | 0.40856500  |
| H  | -1.83658900 | -2.50441600 | 0.58471200  |
| H  | -3.51705200 | -2.83711300 | 1.27830700  |
| H  | -2.85248500 | -0.81036200 | 3.25876600  |
| H  | -3.58835100 | -0.80817600 | 3.37438800  |
| Mg | 1.83172500  | -0.08308500 | 0.00138600  |
| Mg | -0.94070200 | 0.74347500  | -0.03059800 |
| Br | 4.08628000  | -0.77631200 | 0.02253500  |
| Br | -0.06126900 | -0.91880300 | -1.70633000 |
| Br | 0.04243100  | -0.43704100 | 1.96006200  |
| Br | 0.88443300  | 2.40380500  | -0.30242600 |
| Br | -3.53312800 | 0.76972300  | -0.05465900 |

**TS1<sub>T-HMg2Br5-4</sub>**

|   |            |             |             |
|---|------------|-------------|-------------|
| H | 3.14600800 | -1.19722900 | 0.04887600  |
| C | 3.12512400 | -2.51697900 | 0.35829500  |
| H | 3.08540500 | -2.40002100 | 1.43837700  |
| H | 4.09061200 | -2.76455200 | -0.07596900 |
| C | 1.98232200 | -2.86745200 | -0.30588200 |
| H | 1.99537500 | -3.16288400 | -1.34859200 |

|    |             |             |             |
|----|-------------|-------------|-------------|
| H  | 1.01401700  | -2.80799000 | 0.17584400  |
| Mg | -1.73576700 | 0.00522400  | 0.02206500  |
| Mg | 1.07461400  | 0.83214000  | 0.02425900  |
| Br | -0.79561300 | 2.47953400  | -0.04523700 |
| Br | 3.55838500  | 0.54650900  | -0.04722000 |
| Br | 0.06037400  | -0.59003900 | 1.88613800  |
| Br | 0.11200200  | -0.67525300 | -1.80371400 |
| Br | -3.96492600 | -0.77243900 | -0.02165100 |

**TS2<sub>T-HMg2Br5-4</sub>**

|    |             |             |             |
|----|-------------|-------------|-------------|
| H  | 4.28661000  | -3.45247000 | -0.63014400 |
| C  | 3.84144800  | -2.89216900 | 0.19151600  |
| H  | 4.60473600  | -2.19624900 | 0.56806800  |
| H  | 3.56752900  | -3.54552900 | 1.01979000  |
| C  | 2.72702400  | -2.02288900 | -0.23764200 |
| H  | 2.03886600  | -1.63322400 | 0.50214300  |
| H  | 2.74710000  | -1.53950900 | -1.20124300 |
| H  | 1.13690200  | -2.67794300 | -0.99045700 |
| H  | 1.66302500  | -3.20444600 | -0.69679000 |
| Mg | 1.03305800  | 0.94034200  | 0.00037900  |
| Mg | -1.79884500 | -0.04173900 | 0.07107400  |
| Br | -0.96135900 | 2.43707600  | -0.17154800 |
| Br | 0.03818300  | -0.51862700 | 1.88538200  |
| Br | 0.00759300  | -0.75721900 | -1.78841100 |
| Br | -3.99916200 | -0.90331200 | 0.06814200  |
| Br | 3.47856900  | 0.79798200  | 0.03066300  |

**TS3<sub>T-HMg2Br5-4</sub>**

|    |             |             |             |
|----|-------------|-------------|-------------|
| H  | -3.44613200 | -1.30743500 | -0.32109500 |
| C  | -3.44295400 | -2.43161700 | -0.63401600 |
| H  | -4.48823000 | -2.73182500 | -0.59166100 |
| H  | -3.02641800 | -2.33265900 | -1.63930100 |
| C  | -2.57726700 | -3.10481800 | 0.25875000  |
| H  | -1.50907000 | -3.12520100 | 0.06988400  |
| H  | -2.95248300 | -3.73933700 | 1.05533600  |
| H  | -1.70248600 | -1.55328900 | 1.75615100  |
| H  | -2.35635400 | -1.96431900 | 1.67654500  |
| Mg | 1.78906000  | -0.00962200 | -0.04057100 |
| Mg | -1.05840200 | 0.84214100  | -0.05547500 |
| Br | 4.01121700  | -0.81133900 | 0.03330400  |
| Br | -0.14871300 | -1.13381400 | -1.46311400 |
| Br | 0.13570300  | -0.04909400 | 2.06136500  |
| Br | 0.84798800  | 2.35573800  | -0.67040800 |
| Br | -3.50806400 | 0.78086500  | 0.07880300  |
